# Supplementary material for: An RNA sponge controls quorum sensing dynamics and biofilm formation in Vibrio cholerae
Source: PubMed Central journal article supplement (PMC9732341; doi:10.1038/s41467-022-35261-x), 2022-12-08
Supplement: 41467_2022_35261_MOESM1_ESM.pdf [file 41467_2022_35261_MOESM1_ESM.pdf]

## Supplementary Information

### An RNA sponge controls quorum sensing dynamics and biofilm formation in *Vibrio cholerae*

Michaela Huber<sup>1\*</sup>, Anne Lippegau<sup>1\*</sup>, Sahar Melamed<sup>2,3</sup>, Malte Siemers<sup>1</sup>, Benjamin R. Wucher<sup>4</sup>,  
Mona Hoyos<sup>1</sup>, Carey Nadell<sup>4</sup>, Gisela Storz<sup>2</sup>, and Kai Papenfort<sup>1,5#</sup>

<sup>1</sup> Friedrich Schiller University Jena, Institute of Microbiology, 07745 Jena, Germany

<sup>2</sup> Division of Molecular and Cellular Biology, Eunice Kennedy Shriver National Institute of Child Health and Human Development, Bethesda, MD 20892-5430, USA

<sup>3</sup> Department of Microbiology and Molecular Genetics, Faculty of Medicine, The Hebrew University of Jerusalem, Jerusalem 9112102, Israel.

<sup>4</sup> Department of Biological Sciences, Dartmouth College, Hanover, NH 03755, USA

<sup>5</sup> Microverse Cluster, Friedrich Schiller University Jena, 07743 Jena, Germany.

\* these authors contributed equally to this manuscript.

#### **This supplement contains:**

Figures S1 to S8

Tables S1 to S4

Supplemental References

## TABLE OF CONTENTS

|                  |                                                                   |
|------------------|-------------------------------------------------------------------|
| <b>Figure S1</b> | RNA duplex distribution and base-pairing predictions              |
| <b>Figure S2</b> | Interaction partners of selected sRNAs discovered by RIL-seq      |
| <b>Figure S3</b> | sRNA-sRNA interactions                                            |
| <b>Figure S4</b> | Expression pattern of QrrX and the Qrr1-4 sRNAs                   |
| <b>Figure S5</b> | Stability of QrrX upon induction of Qrr1-4                        |
| <b>Figure S6</b> | Influence of RNase E and RNase G on QrrX - Qrr4 interaction       |
| <b>Figure S7</b> | Transcriptional regulation of QrrX                                |
| <b>Figure S8</b> | Influence of QrrX on biofilm accumulation                         |
| <b>Table S1</b>  | Previously published sRNA targets captured in chimeras in RIL-seq |
| <b>Table S2</b>  | Plasmids used in this study                                       |
| <b>Table S3</b>  | Strains used in this study                                        |
| <b>Table S4</b>  | Oligonucleotides used in this study                               |

## A

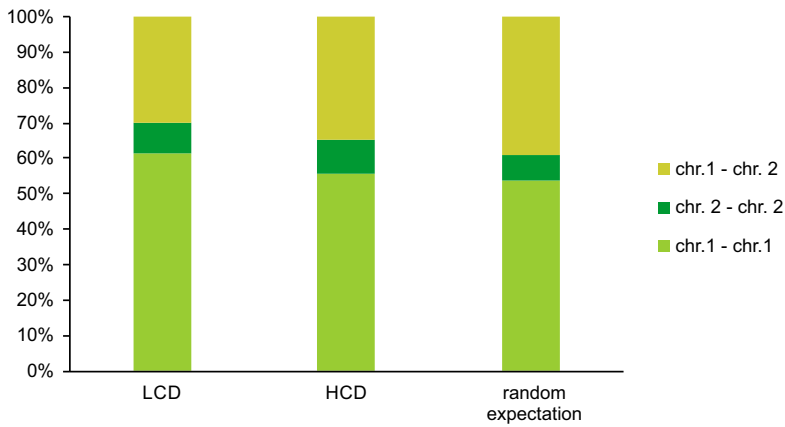

## B

### Qrr1-4

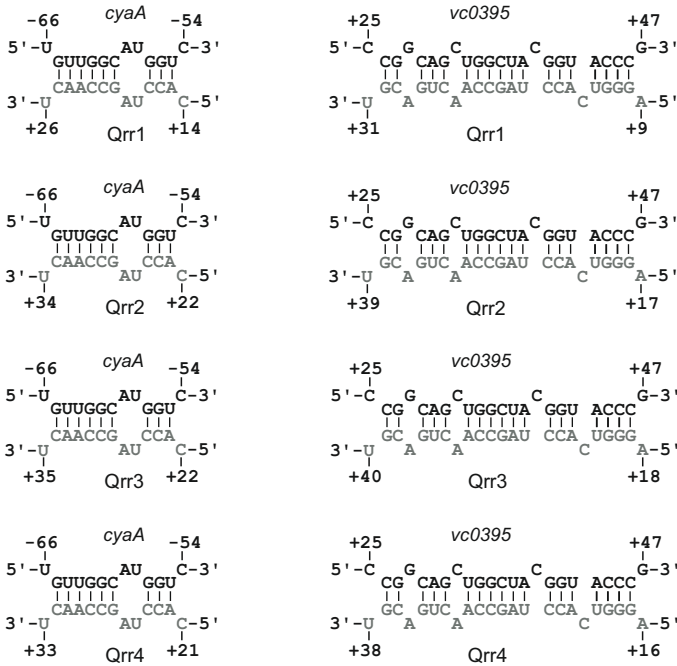

## C

### Spot 42

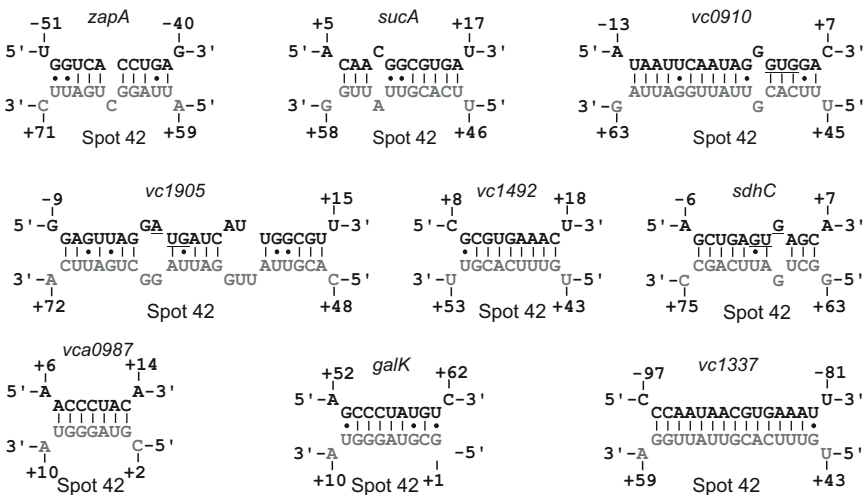

## D

### GcvB

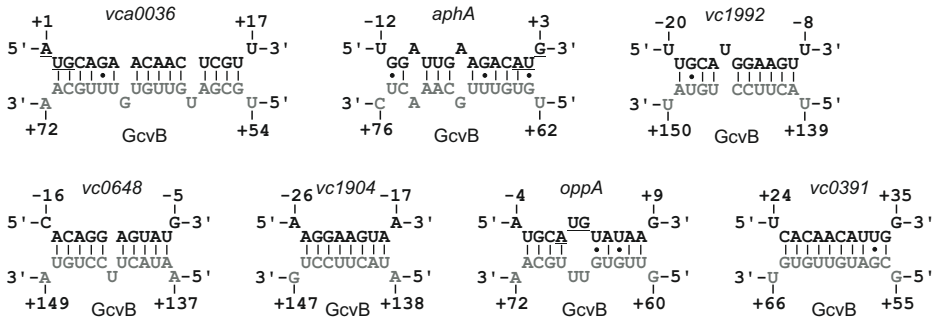

## E

### TfoR

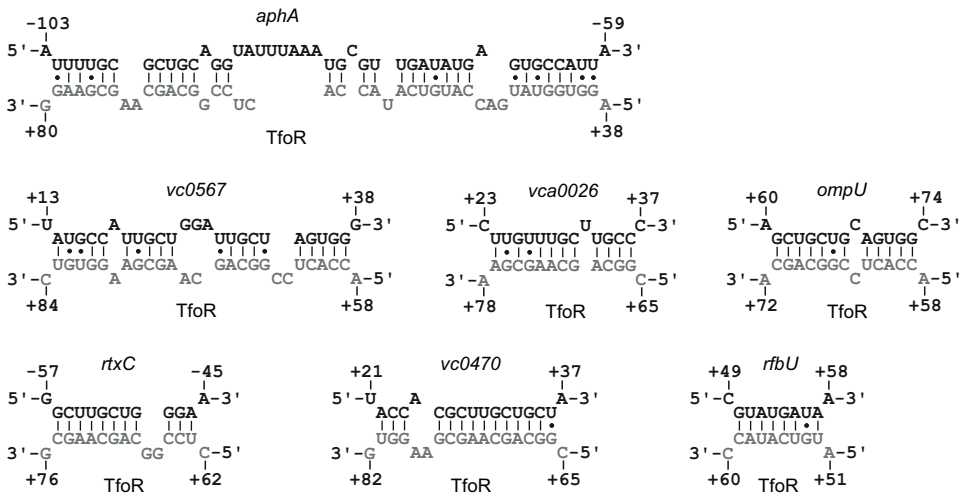

## F

### Vcr001

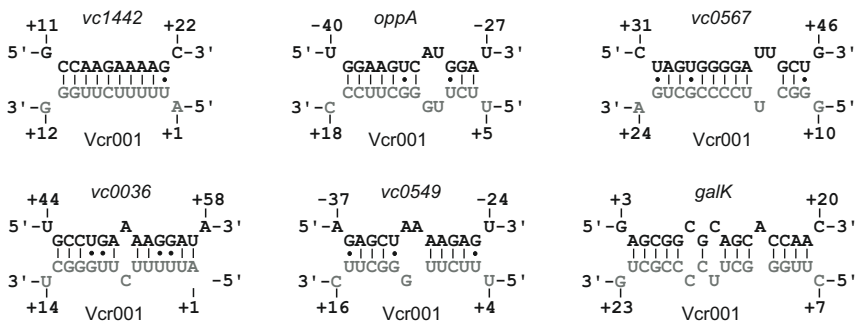

## G

### Vcr017

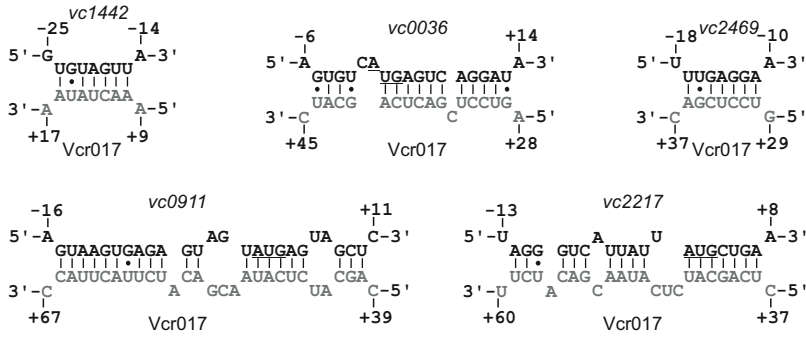

## H

### Vcr043

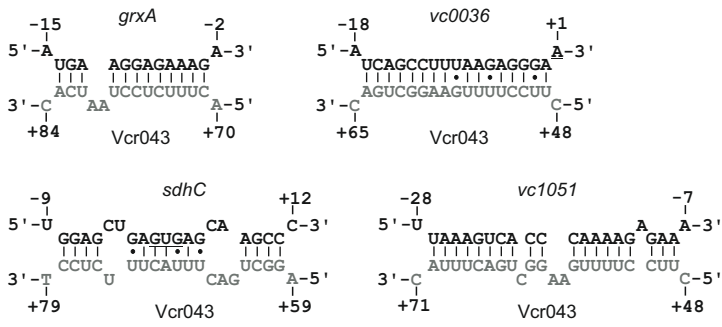

## I

### Vcr227

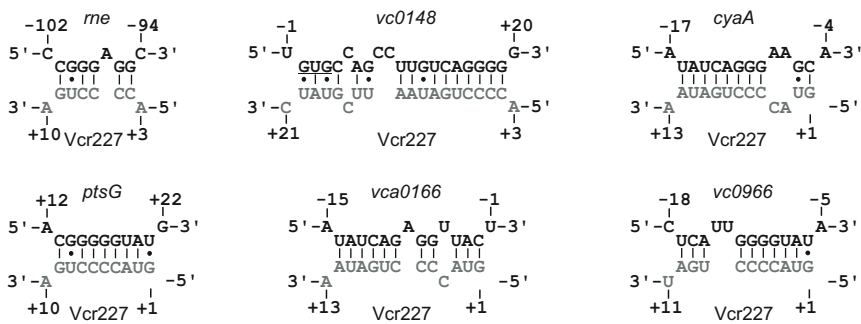

### **Figure S1: RNA duplex distribution and base-pairing predictions**

**(A)** Chromosomal localization of RNA-RNA chimeras discovered by RIL-seq at low (LCD) and high cell density (HCD), respectively. Percentage of inter- and intrachromosomal interactions together with the expected values are presented in the indicated colors.

**(B-I)** Predicted base-pairing interactions between selected sRNAs and targets tested in Fig. 1C. The start codon is underlined. Numbers indicate position relative to the start codon (mRNAs) or to the transcriptional start site (sRNAs). *RNAhybrid* (Bielefeld Bioinformatics Service) was used for predictions (1). Source data underlying panel **(A)** is provided as a Source Data file.

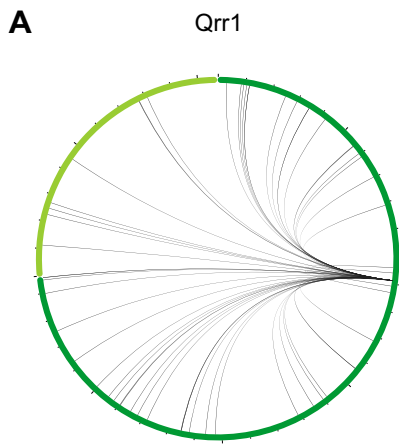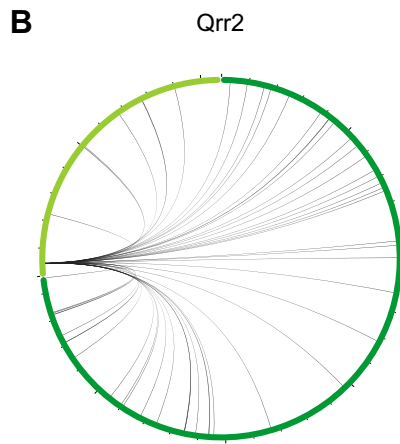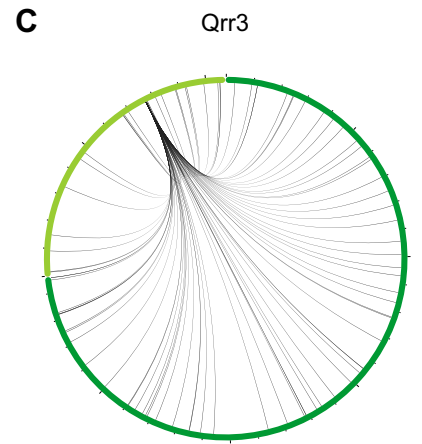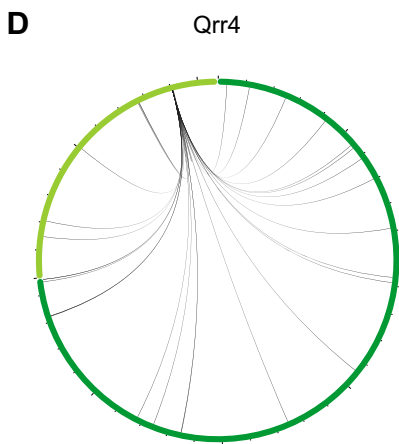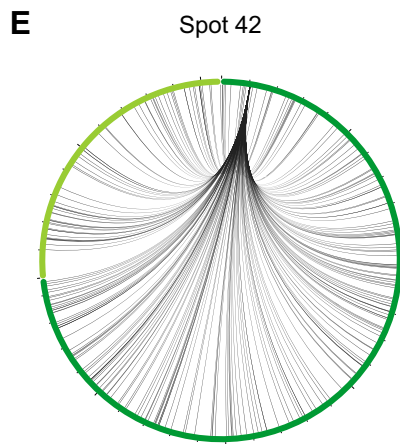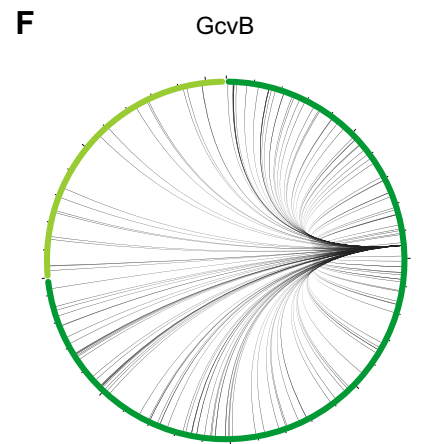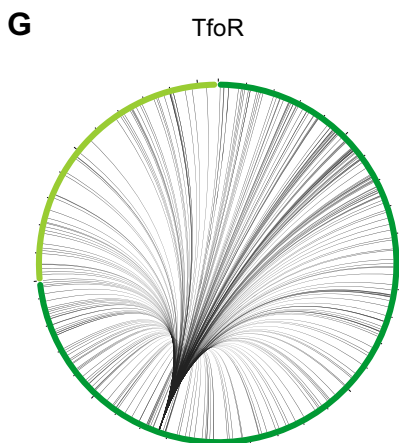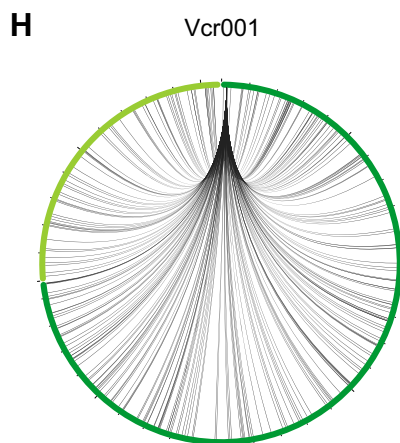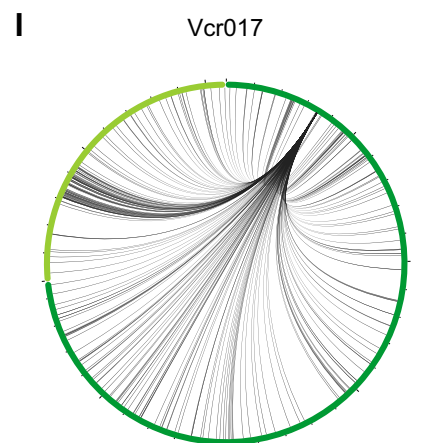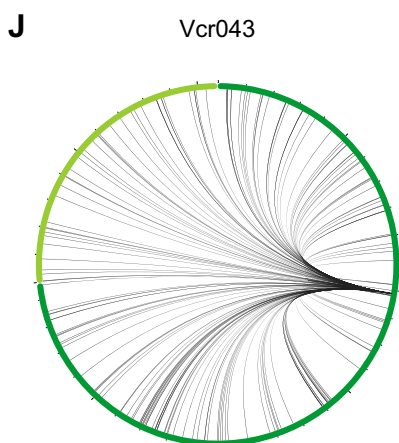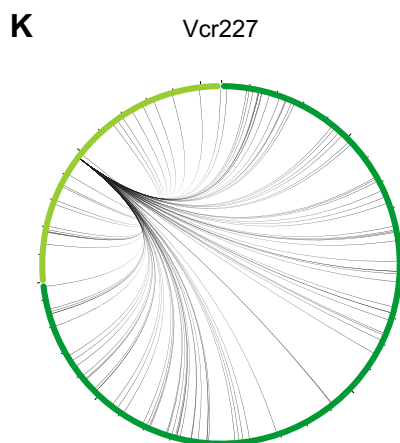

**Figure S2: Interaction partners of selected sRNAs discovered by RIL-seq**

**(A-K)** Interaction partners of Qrr1-4 (A-D), Spot 42 (E), GcvB (F), TfoR (G), Vcr001 (H), Vcr017 (I), Vcr043 (J) and Vcr227 (K). Circos plots visualizing interaction partners identified by RIL-seq. The first and the second chromosome are marked in dark and light green, respectively. Circos plots were generated using the circos component of the Dash Bio package.



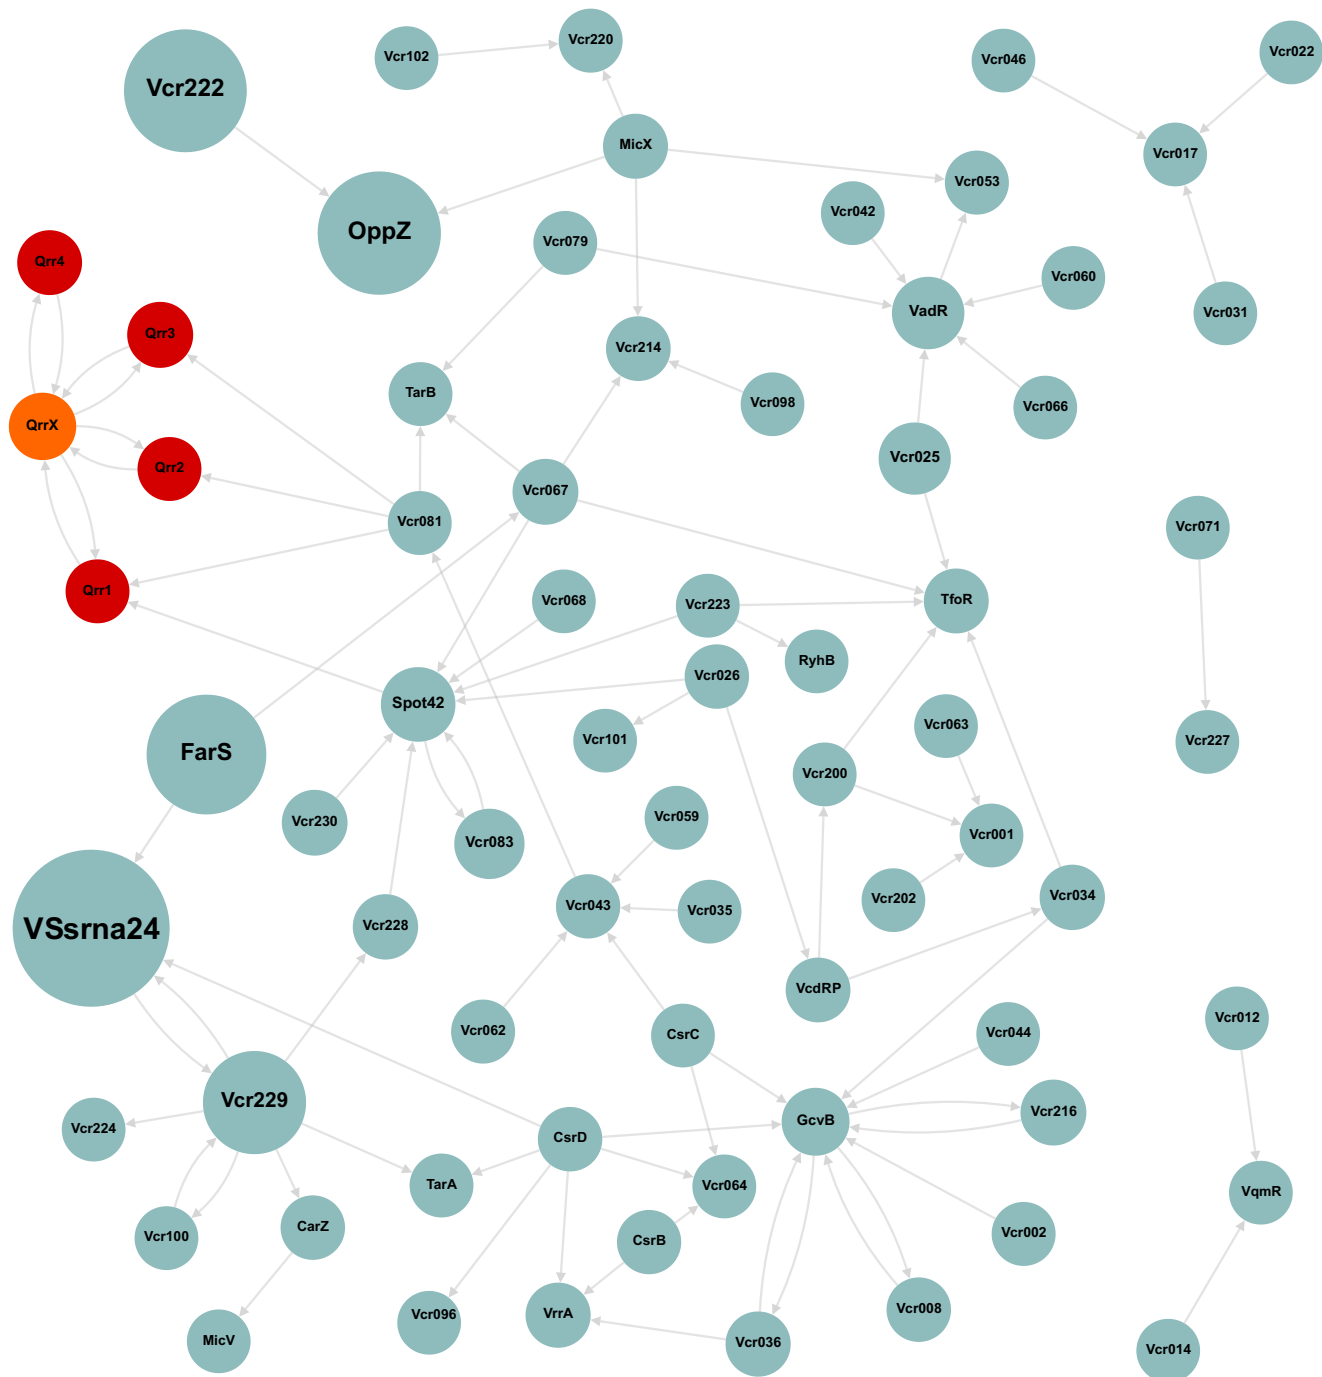

**Figure S3: sRNA-sRNA interactions**

Graph-based visualization of all sRNA-sRNA interactions. Qrr1-4 and QrrX are highlighted in red and orange, respectively. The arrows between sRNA circles indicate the order in which the sRNAs appear in the chimeric transcript, pointing from ones located at the 5' end towards ones at the 3' end. The size of the circles correlates with the number of chimeric reads attributed to the sRNA.

**A**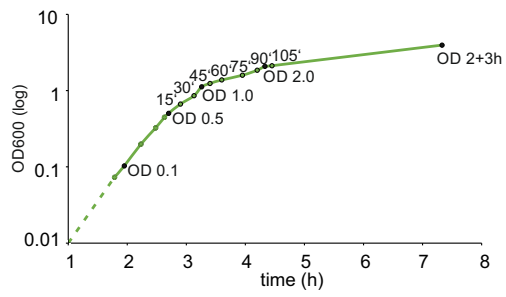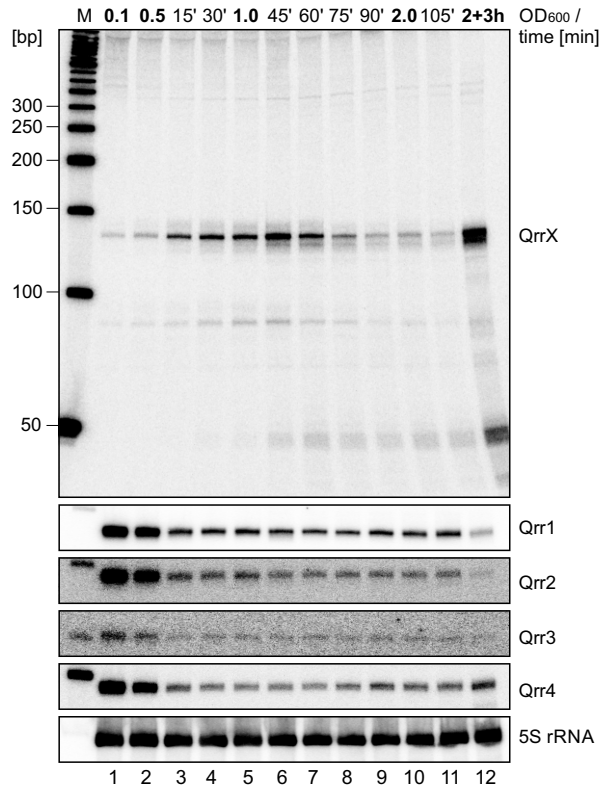**B**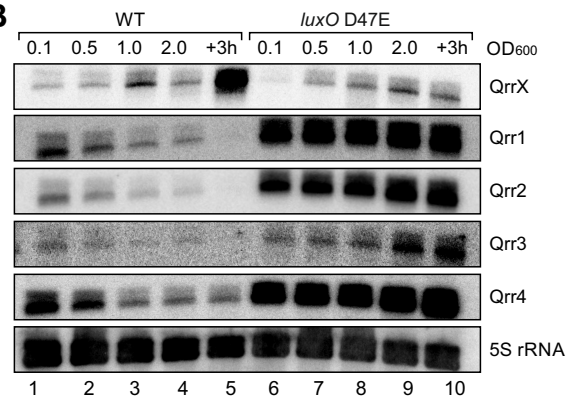**C**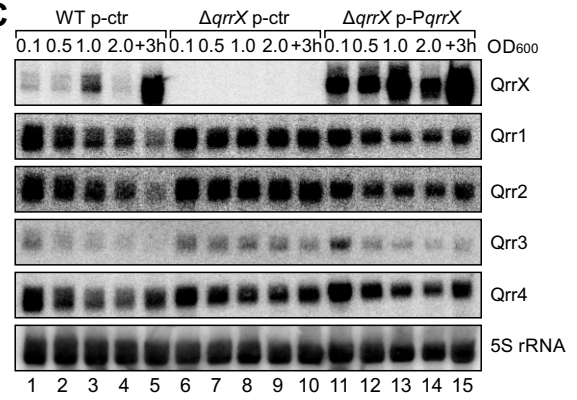

#### **Figure S4: Expression patterns of QrrX and the Qrr1-4 sRNAs**

**(A)** *V. cholerae* wild-type cells were cultivated in LB medium and RNA samples were collected at various stages of growth and time points as indicated. Northern blot analysis with specific oligonucleotide probes served to monitor QrrX, Qrr1, Qrr2, Qrr3 and Qrr4 RNA levels. Probing for 5S ribosomal RNA served as loading control. The experiment was performed with three independent biological replicates ( $n = 3$ ).

**(B)** *V. cholerae* wild-type and *luxO* D47E cells were cultivated in LB medium and RNA samples were collected at the indicated OD<sub>600</sub> readings. Northern blot analysis with specific oligonucleotide probes served to monitor QrrX, Qrr1, Qrr2, Qrr3 and Qrr4 RNA levels. Probing for 5S ribosomal RNA served as loading control. The experiment was performed with two independent biological replicates ( $n = 2$ ).

**(C)** *V. cholerae* wild-type and  $\Delta qrrX$  cells carrying either a control plasmid (p-ctr) or a complementation plasmid where *qrrX* is expressed from its native promoter (p-P*qrrX*) were cultivated in LB medium, and RNA samples were collected at the indicated OD<sub>600</sub> readings. Northern blot analysis with specific oligonucleotide probes served to monitor QrrX, Qrr1, Qrr2, Qrr3 and Qrr4 RNA levels. Probing for 5S ribosomal RNA served as loading control. The experiment was performed with three independent biological replicates ( $n = 3$ ). Source data underlying panels **(A)-(C)** are provided as a Source Data file.

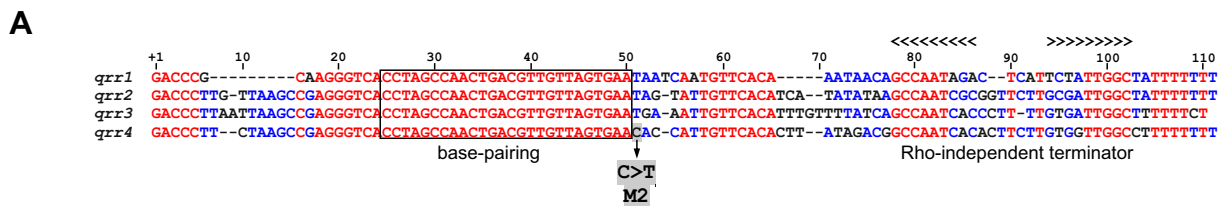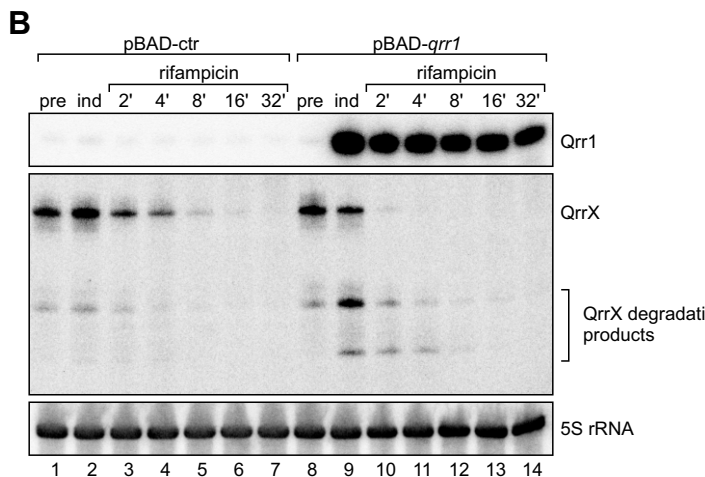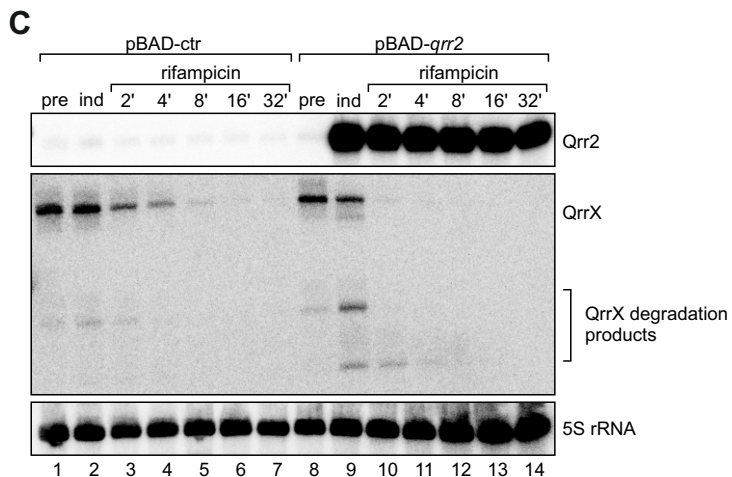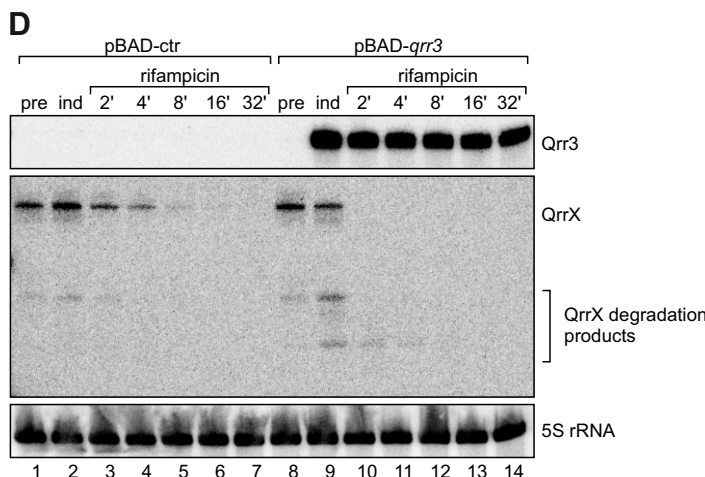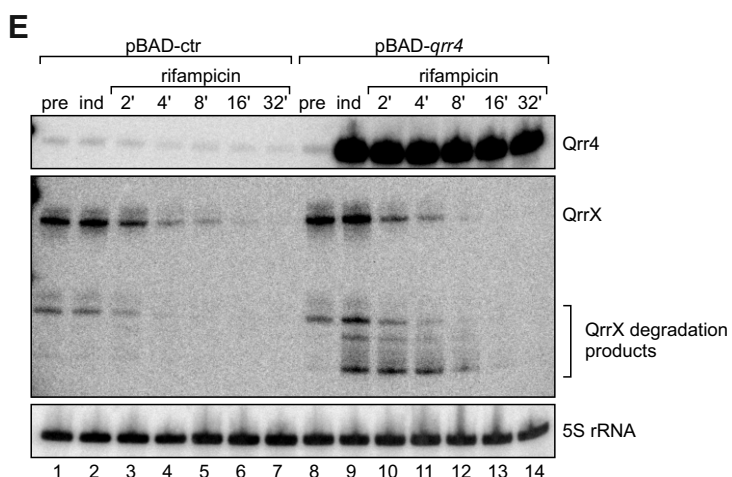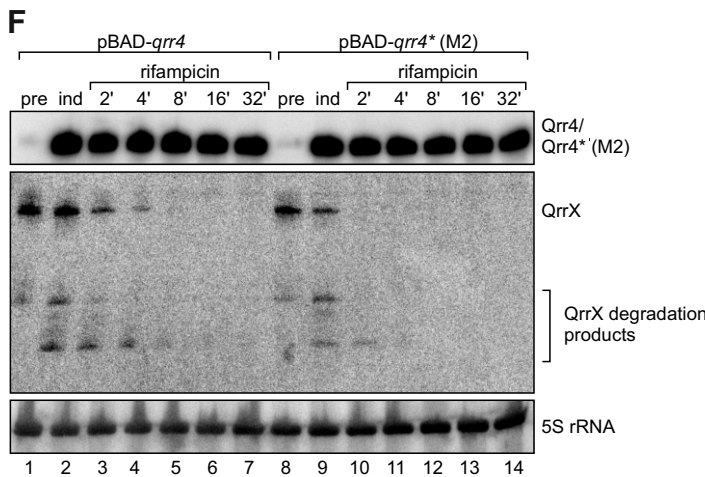

### Figure S5: Stability of QrrX upon induction of Qrr1-4

**(A)** Alignment of *qrr1-4*. The sequences of *qrr1*, *qrr2*, *qrr3* and *qrr4* were aligned using the Multalin tool (2). The predicted region of base-pairing identical in all four homologs is marked with a black box, the M2 mutation in *qrr4* is marked in gray. The Rho-independent terminator is indicated.

**(B-E)** *V. cholerae* wild-type cells harboring either pBAD-*qrr1* (B), pBAD-*qrr2* (C), pBAD-*qrr3* (D), pBAD-*qrr4* (E) or an empty control plasmid (pBAD-ctr) were cultivated in LB medium to OD<sub>600</sub> of 1.0. Expression of the Qrr1-4 sRNAs was induced with L-arabinose and rifampicin was added to monitor RNA stability. Northern blot analysis shows QrrX and Qrr1-4 levels at the indicated time points. 5S ribosomal RNA was used as loading control. The experiment was performed with two independent biological replicates ( $n = 2$ ).

**(F)** *V. cholerae* wild-type cells harboring either pBAD-*qrr4* or pBAD-*qrr4*<sup>\*</sup> (M2) (indicated in (A)) were cultivated in LB medium to OD<sub>600</sub> of 1.0. Expression of Qrr4 or Qrr4<sup>\*</sup> was induced with L-arabinose and rifampicin was added to monitor RNA stability. Northern blot analysis shows QrrX and Qrr4/Qrr4<sup>\*</sup> levels at the indicated time points. 5S ribosomal RNA was used as loading control. The experiment was performed with three independent biological replicates ( $n=3$ ). Source data underlying panels **(B)-(F)** are provided as a Source Data file.

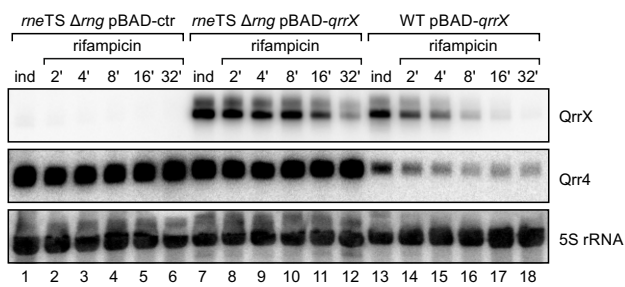

### Figure S6: Influence of RNase E and RNase G on QrrX - Qrr4 interaction

*V. cholerae* wild-type and *rne*<sup>TS</sup>  $\Delta$ *rng* cells carrying either pBAD-ctr or pBAD-*qrrX* were cultivated at 30°C to OD<sub>600</sub> of 0.2 and then shifted to 44°C. After 15 min, expression of QrrX was induced with L-arabinose and rifampicin was added to monitor RNA stability. Northern blot analysis shows QrrX and Qrr4 levels at the indicated time points. 5S ribosomal RNA was used as loading control. The experiment was performed with three independent biological replicates ( $n = 3$ ). Source data underlying Figure S6 is provided as a Source Data file.

Figure S7

Huber et al., 2022

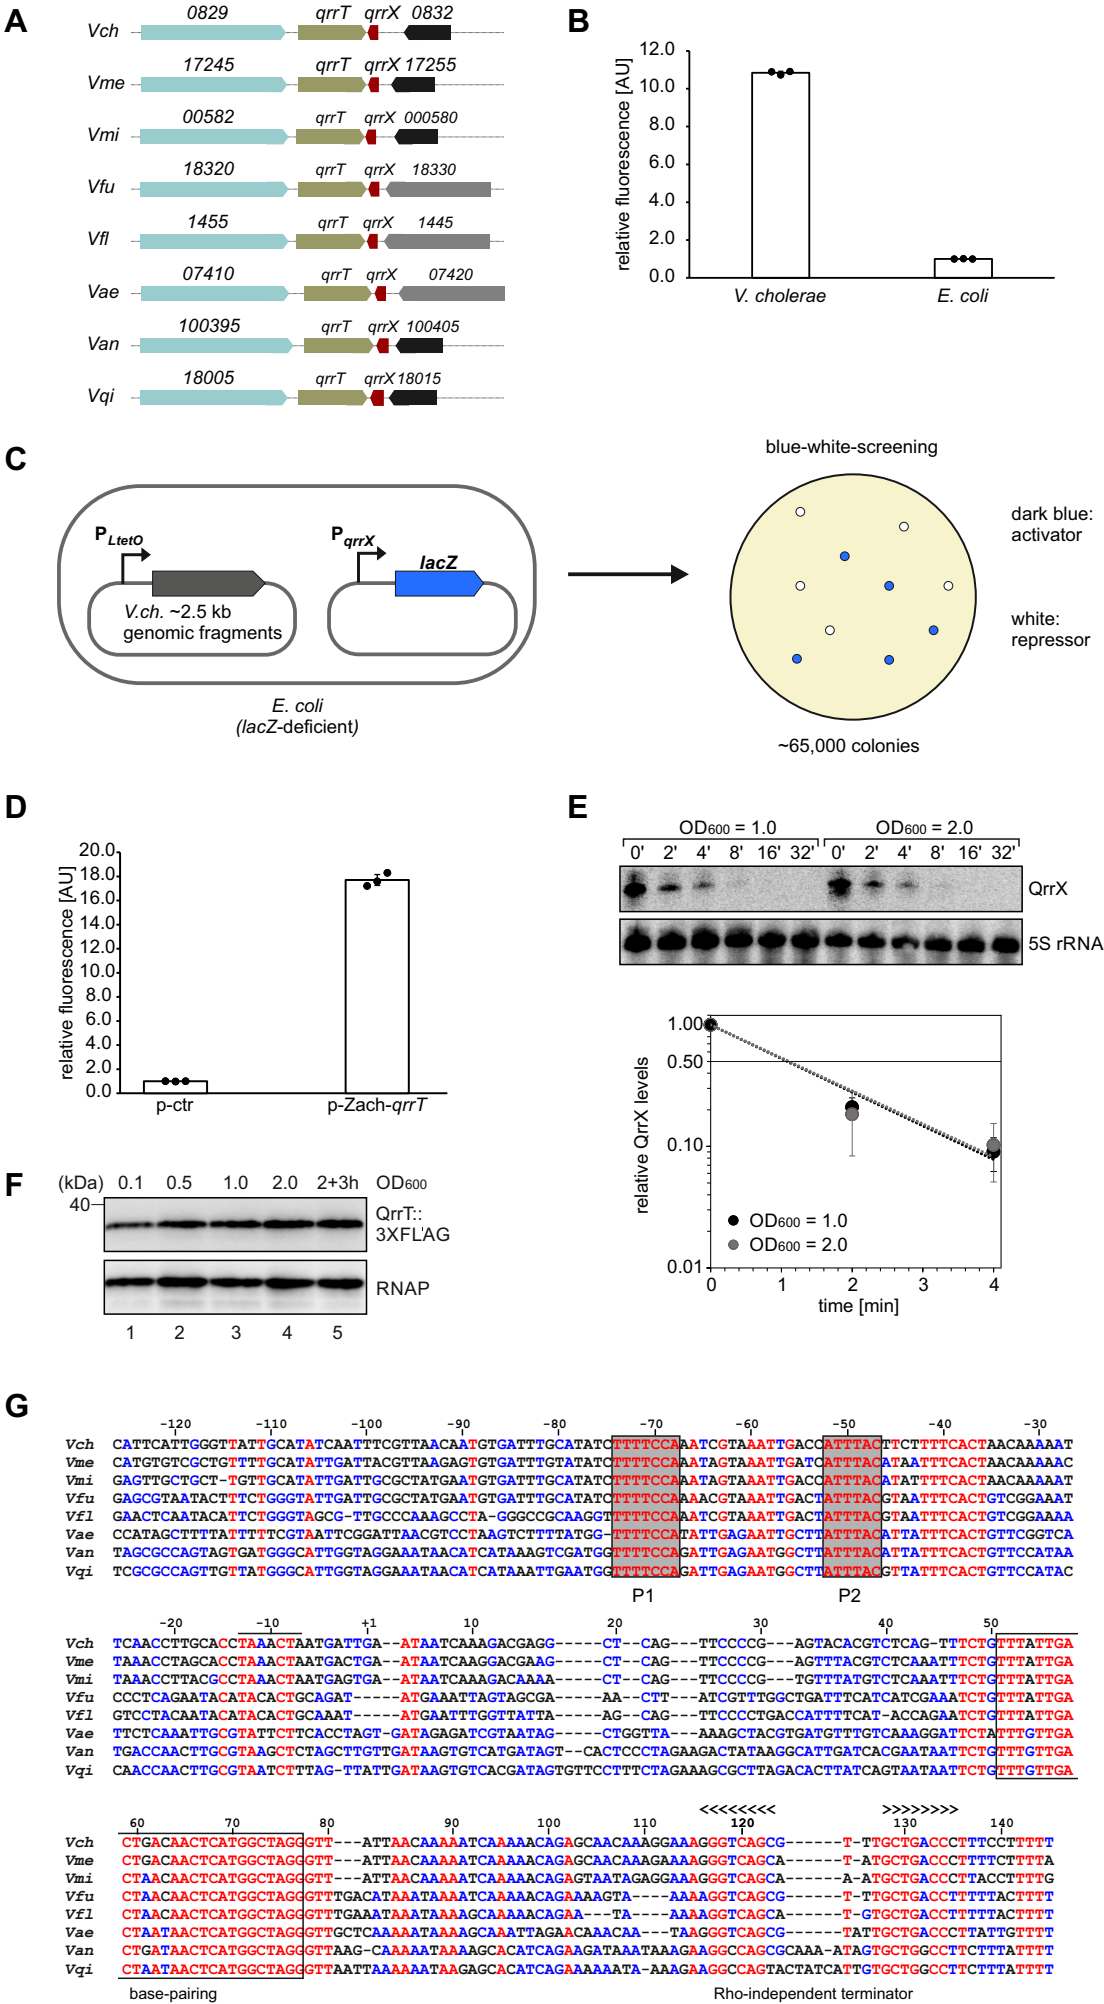

## Figure S7: Transcriptional regulation of QrrX

**(A)** Gene synteny analysis of the genomic loci encoding the *qrrX* sRNA in various *Vibrio* species. Homologous genes are shown in the same colors. *Vch*, *Vibrio cholerae*; *Vme*, *Vibrio metoecus*, *Vmi*, *Vibrio mimicus*; *Vfu*, *Vibrio furnissii*; *Vfl*, *Vibrio fluvialis*; *Vae*, *Vibrio aestuarianus*; *Van*, *Vibrio anguillarum*, *Vqi*, *Vibrio qinghaiensis*.

**(B)** Relative  $P_{qrrX}$  promoter activity. *V. cholerae* and *E. coli* Top10 cells carrying an mKate2-based transcriptional reporter for *qrrX* ( $P_{qrrX}::mKate2$ ) were cultivated in LB medium and relative fluorescence was determined. Data are presented as mean values of biological independent replicates  $\pm$ SD,  $n=3$ .

**(C)** Schematic scheme visualizing the experimental procedure to identify factors regulating the transcription of *qrrX*.

**(D)** Relative  $P_{qrrX}$  promoter activity. *E. coli* Top10 cells carrying an mKate2-based transcriptional reporter for *qrrX* ( $P_{qrrX}::mKate2$ ) and an empty control plasmid (p-ctr) or a pZach library plasmid containing the full *qrrT* gene (pZach-*qrrT*) were cultivated in LB medium and relative fluorescence was determined. Data are presented as mean values of biological independent replicates  $\pm$ SD,  $n=3$ .

**(E)** Stability of QrrX. *V. cholerae* wild-type cells were cultivated in LB medium to  $OD_{600} = 1.0$  and  $OD_{600} = 2.0$ , and rifampicin was added to determine RNA stability. Northern blot analysis shows QrrX levels at the indicated time points. 5S ribosomal RNA was used as loading control. Graph shows quantification of three independent biological replicates. QrrX levels at 0 min were set to 1.

**(F)** Expression of QrrT. *V. cholerae* *qrrT::3XFLAG* cells were cultivated in LB medium and protein samples were collected at various stages of growth. Western blot analysis was performed to determine QrrT protein levels. RNAP served as loading control. The experiment was performed with three independent biological replicates ( $n = 3$ ).

**(G)** Alignment of *qrrX* sequences including promoter region. Conserved *qrrX* promoter elements P1 and P2 are marked with gray boxes. Numbers above the sequences indicate the distance to the transcriptional start site. *Vch*, *Vibrio cholerae*; *Vme*, *Vibrio metoecus*, *Vmi*, *Vibrio mimicus*; *Vfu*, *Vibrio furnissii*; *Vfl*, *Vibrio fluvialis*; *Vae*, *Vibrio aestuarianus*; *Van*, *Vibrio anguillarum*, *Vqi*, *Vibrio qinghaiensis*. Source data underlying panels **(B)**, **(D)**, **(E)** and **(F)** are provided as a Source Data file.



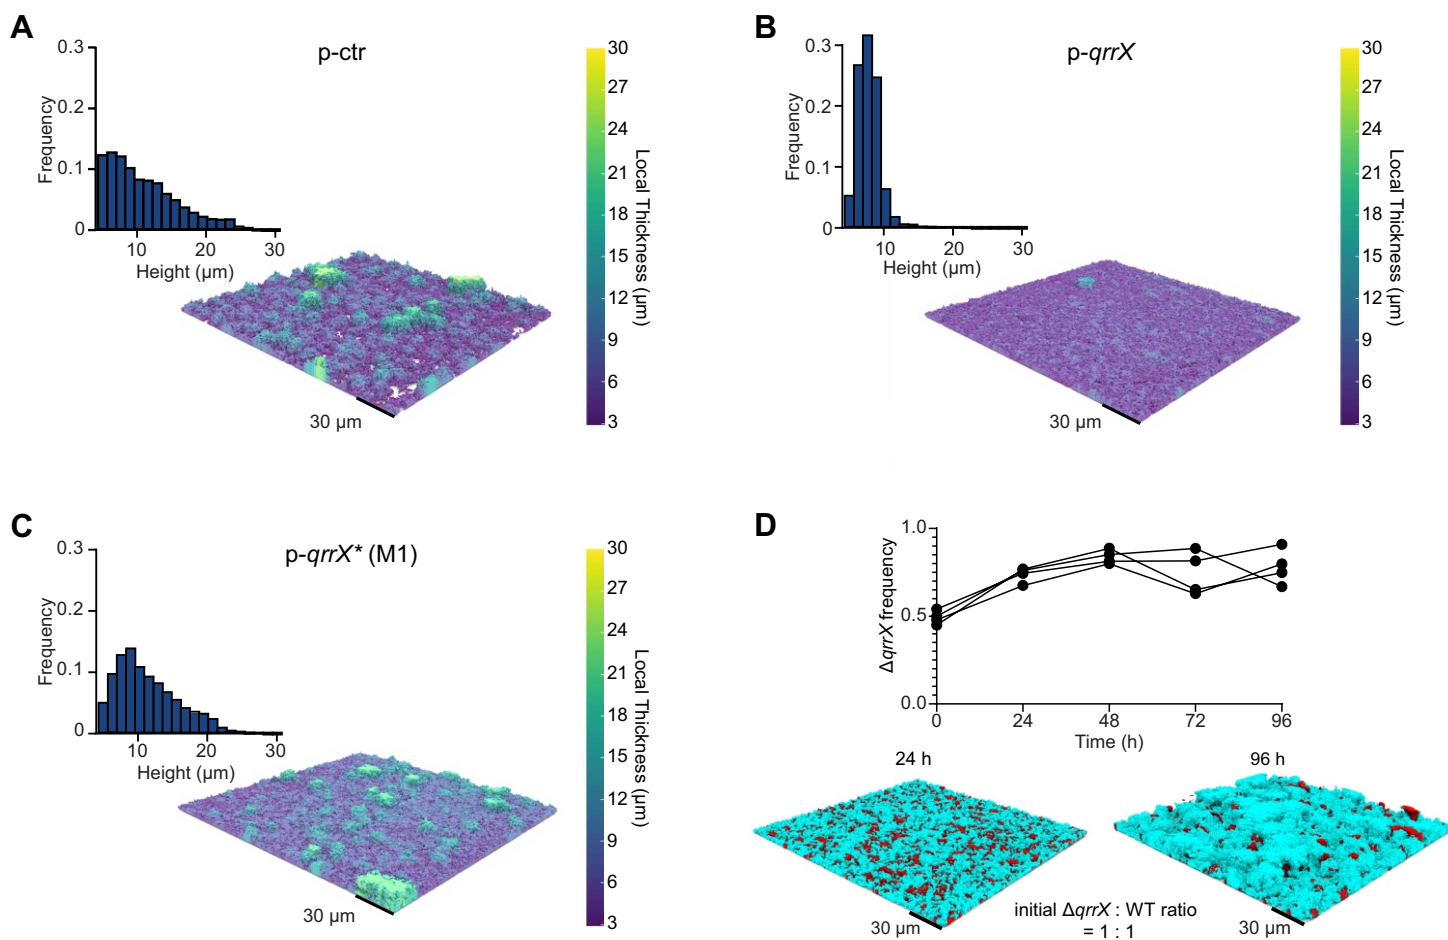

### Figure S8: Influence of QrrX on biofilm accumulation

(A-C) Biofilms of *V. cholerae* wild-type cells harboring either p-ctr (A), p-qrrX (B) or p-qrrX\* (M1) (C) were grown for 48 h and imaged through their whole depth by confocal microscopy. 3D renderings of representative images are color-coded by local thickness. Bar graphs show frequency distributions of local height for each biofilm.

(D) Mixed biofilm of *V. cholerae* wild-type and  $\Delta qrrX$  cells seeded at an initial ratio of 1:1 was grown for 96 h. Line graph shows the trajectory of each replicate ( $n = 4$ ). Representative images are shown for 24 h and 96 h of growth (WT = red,  $\Delta qrrX$  = cyan). Source data underlying panels (A)-(D) are provided as a Source Data file.

**Table S1:** Previously published sRNA targets captured in chimeras in RIL-seq. Numbers shown in parentheses are below our threshold of 20 chimeras. Altogether, this results in 40 interactions found in our data set, of which 35 are found in at least one condition with a number of chimeras above our threshold.

| sRNA   | target               | # chimeras LCD | # chimeras HCD | reference |
|--------|----------------------|----------------|----------------|-----------|
| CarZ   | <i>vc2390 (carA)</i> | [6]            | [7]            | (13)      |
| FarS   | <i>vc1740 (fadE)</i> | 149            | 126            | (14)      |
| MicV   | <i>vc1854 (ompT)</i> | [8]            | 25             | (6)       |
| MicV   | <i>vc0156 (btuB)</i> | 47             | ---            | (6)       |
| MicV   | <i>vc1091 (oppA)</i> | 78             | ---            | (6)       |
| MicX   | <i>vc0972</i>        | 104380         | 20332          | (15)      |
| MicX   | <i>vc0620</i>        | 1925           | [5]            | (15)      |
| OppZ   | <i>vc1092 (oppB)</i> | 22             | 126            | (13)      |
| Qrr1   | <i>vc0583 (hapR)</i> | 280            | 355            | (16)      |
| Qrr1   | <i>vca0939</i>       | [8]            | [4]            | (17)      |
| Qrr2   | <i>vc2647 (aphA)</i> | 14500          | 582            | (18, 19)  |
| Qrr2   | <i>vc0583 (hapR)</i> | 65             | 72             | (16)      |
| Qrr2   | <i>vca0939</i>       | [13]           | [8]            | (17)      |
| Qrr3   | <i>vc2647 (aphA)</i> | 5242           | 915            | (18, 19)  |
| Qrr3   | <i>vc0583 (hapR)</i> | 1400           | 2082           | (16)      |
| Qrr3   | <i>vca0939</i>       | 25             | 25             | (17)      |
| Qrr4   | <i>vc2647 (aphA)</i> | 6133           | 189            | (18, 19)  |
| Qrr4   | <i>vc0583 (hapR)</i> | 66             | 32             | (16)      |
| TfoR   | <i>vc1153 (tfoX)</i> | 895            | 86             | (20)      |
| TfoR   | <i>vc0534 (rpoS)</i> | 143            | 25             | (21)      |
| VadR   | <i>vc1264 (irpA)</i> | [14]           | ---            | (22)      |
| VadR   | <i>vc0916 (vpsU)</i> | 42             | ---            | (22)      |
| VadR   | <i>vc2352</i>        | 557            | 70             | (22)      |
| VcdRP  | <i>vc2013 (ptsG)</i> | 706            | 150            | (23)      |
| VcdRP  | <i>vc0995 (nagE)</i> | 24             | [9]            | (23)      |
| VcdRP  | <i>vc0966 (ptsH)</i> | 361            | 31             | (23)      |
| Vcr043 | <i>vc0534 (rpoS)</i> | ---            | 74             | (21)      |
| VqmR   | <i>vca0068</i>       | 96             | 19             | (4)       |
| VqmR   | <i>vc0200</i>        | ---            | [6]            | (4)       |
| VqmR   | <i>vca0591</i>       | 95             | 93             | (4)       |
| VqmR   | <i>vc1865</i>        | 6567           | 181            | (4)       |
| VqmR   | <i>vc1063</i>        | 31             | [13]           | (4)       |
| VqmR   | <i>vca0917</i>       | 71             | 141            | (4)       |
| VqmR   | <i>vc2647 (aphA)</i> | ---            | 336            | (8)       |
| VrrA   | <i>vc2213 (ompA)</i> | 782            | 94             | (24)      |
| VrrA   | <i>vc1854 (ompT)</i> | [10]           | 194            | (25)      |
| VrrA   | <i>vc2467 (rpoE)</i> | 83             | ---            | (6)       |
| VrrA   | <i>vca0059 (lpp)</i> | 3300           | 4396           | (6)       |
| VrrA   | <i>vca1835 (pal)</i> | 94             | [15]           | (6)       |
| VrrA   | <i>vc0429</i>        | 26             | 31             | (6)       |

**Table S2:** Plasmids used in this study

| Plasmid trivial name                                                  | Plasmid Stock name | Relevant fragment                                       | Comment                                                   | Origin, marker           | Reference  |
|-----------------------------------------------------------------------|--------------------|---------------------------------------------------------|-----------------------------------------------------------|--------------------------|------------|
| <b>Plasmids for RIL-seq target validation (GFP reporter plasmids)</b> |                    |                                                         |                                                           |                          |            |
| pXG10-sfGFP                                                           | pXG10-sfGFP        | lacZ':::sfGFP                                           | Template plasmid for translational reporter               | pSC101*, Cm <sup>R</sup> | (3)        |
| pXG30-sfGFP                                                           | pXG30-sfGFP        | FLAG::lacZ':::sfGFP                                     | Template plasmid for translational reporter (for operons) | pSC101*, Cm <sup>R</sup> | (3)        |
| pXG10-vc0395                                                          | pMH063             | 5' UTR + 20 aa of <i>vc0395</i>                         | Translational GFP reporter                                | pSC101*, Cm <sup>R</sup> | This study |
| pXG10-vc0122 ( <i>cyaA</i> )                                          | pJR026             | 5' UTR + 20 aa of <i>vc0122</i>                         | Translational GFP reporter                                | pSC101*, Cm <sup>R</sup> | This study |
| pXG10-vc2478 ( <i>zapA</i> )                                          | pJR039             | 5' UTR + 20 aa of <i>vc2478</i>                         | Translational GFP reporter                                | pSC101*, Cm <sup>R</sup> | This study |
| pXG30-vc2088-vc2087 ( <i>sucA</i> )                                   | pKT003             | 3' part of <i>vc2088</i> + IGR + 20 aa of <i>vc2087</i> | Translational GFP reporter                                | pSC101*, Cm <sup>R</sup> | This study |
| pXG10-1C-vc0910                                                       | pNP058             | 5' UTR + 15 aa of <i>vc0910</i>                         | Translational GFP reporter                                | pSC101*, Cm <sup>R</sup> | This study |
| pXG10-vc1905                                                          | pKT006             | 5' UTR + 20 aa of <i>vc1905</i>                         | Translational GFP reporter                                | pSC101*, Cm <sup>R</sup> | This study |
| pXG10-vc1492                                                          | pKT001             | 5' UTR + 20 aa of <i>vc1492</i>                         | Translational GFP reporter                                | pSC101*, Cm <sup>R</sup> | This study |
| pXG10-vc2091 ( <i>sdhC</i> )                                          | pMH073             | 5' UTR + 20 aa of <i>vc2091</i>                         | Translational GFP reporter                                | pSC101*, Cm <sup>R</sup> | This study |
| pXG10-vc0987                                                          | pJR040             | 5' UTR + 20 aa of <i>vc0987</i>                         | Translational GFP reporter                                | pSC101*, Cm <sup>R</sup> | This study |
| pXG30-vc1596-vc1595 ( <i>galK</i> )                                   | pMH066             | 3' part of <i>vc1596</i> + IGR + 20 aa of <i>vc1595</i> | Translational GFP reporter                                | pSC101*, Cm <sup>R</sup> | This study |
| pXG30-vc1336-vc1337                                                   | pMH072             | 3' part of <i>vc1336</i> + IGR + 20 aa of <i>vc1337</i> | Translational GFP reporter                                | pSC101*, Cm <sup>R</sup> | This study |
| pXG10-vc0036                                                          | pMH093             | 5' UTR + 20 aa of <i>vc0036</i>                         | Translational GFP reporter                                | pSC101*, Cm <sup>R</sup> | This study |
| pXG10-vc2647 ( <i>aphA</i> )                                          | pKP462             | 5' UTR + 20 aa of <i>vc2647</i>                         | Translational GFP reporter                                | pSC101*, Cm <sup>R</sup> | (8)        |
| pXG10-vc1992                                                          | pSM001             | 5' UTR + 20 aa of <i>vc1992</i>                         | Translational GFP reporter                                | pSC101*, Cm <sup>R</sup> | This study |
| pXG10-vc0648                                                          | pKT008             | 5' UTR + 20 aa of <i>vc0648</i>                         | Translational GFP reporter                                | pSC101*, Cm <sup>R</sup> | This study |
| pXG10-vc1904                                                          | pKT005             | 5' UTR + 20 aa of <i>vc1904</i>                         | Translational GFP reporter                                | pSC101*, Cm <sup>R</sup> | This study |
| pXG10-vc1091 ( <i>oppA</i> )                                          | pMD092             | 5' UTR + 20 aa of <i>vc1091</i>                         | Translational GFP reporter                                | pSC101*, Cm <sup>R</sup> | This study |
| pXG10-vc0391                                                          | pKT007             | 5' UTR + 20 aa of <i>vc0391</i>                         | Translational GFP reporter                                | pSC101*, Cm <sup>R</sup> | This study |
| pXG10-vc0567                                                          | pYH034             | 5' UTR + 15 aa of <i>vc0567</i>                         | Translational GFP reporter                                | pSC101*, Cm <sup>R</sup> | This study |
| pXG10-1C-vc0026                                                       | pYH038             | 5' UTR + 15 aa of <i>vc0026</i>                         | Translational GFP reporter                                | pSC101*, Cm <sup>R</sup> | This study |

|                                                                          |         |                                                 |                                                      |                             |            |
|--------------------------------------------------------------------------|---------|-------------------------------------------------|------------------------------------------------------|-----------------------------|------------|
| pXG10-1C-vc0633<br>(ompU)                                                | pNP085  | 5' UTR + 30 aa of<br>vc0633                     | Translational GFP<br>reporter                        | pSC101*,<br>Cm <sup>R</sup> | (6)        |
| pXG10-vc1449<br>(rtxC)                                                   | pKP353  | 5' UTR + 24 aa of<br>vc1449                     | Translational GFP<br>reporter                        | pSC101*,<br>Cm <sup>R</sup> | (4)        |
| pXG10-vc0470                                                             | pMH067  | 5' UTR + 20 aa of<br>vc0470                     | Translational GFP<br>reporter                        | pSC101*,<br>Cm <sup>R</sup> | This study |
| pXG10-vc0260<br>(rfbU)                                                   | pYH033  | 5' UTR + 15 aa of<br>vc0260                     | Translational GFP<br>reporter                        | pSC101*,<br>Cm <sup>R</sup> | This study |
| pXG10-vc1442                                                             | pMH060  | 5' UTR + 20 aa of<br>vc1442                     | Translational GFP<br>reporter                        | pSC101*,<br>Cm <sup>R</sup> | This study |
| pXG10-vc0036                                                             | pJR029  | 5' UTR + 20 aa of<br>vc0036                     | Translational GFP<br>reporter                        | pSC101*,<br>Cm <sup>R</sup> | This study |
| pXG10-vc0549                                                             | pMH071  | 5' UTR + 20 aa of<br>vc0549                     | Translational GFP<br>reporter                        | pSC101*,<br>Cm <sup>R</sup> | This study |
| pXG10-vc2469                                                             | pJR044  | 5' UTR + 20 aa of<br>vc2469                     | Translational GFP<br>reporter                        | pSC101*,<br>Cm <sup>R</sup> | This study |
| pXG10-vc0911                                                             | pJR043  | 5' UTR + 20 aa of<br>vc0911                     | Translational GFP<br>reporter                        | pSC101*,<br>Cm <sup>R</sup> | This study |
| pXG10-vc2217                                                             | pJR042  | 5' UTR + 20 aa of<br>vc2217                     | Translational GFP<br>reporter                        | pSC101*,<br>Cm <sup>R</sup> | This study |
| pXG10-vc1146<br>(grxA)                                                   | pMH059  | 5' UTR + 20 aa of<br>vc1146                     | Translational GFP<br>reporter                        | pSC101*,<br>Cm <sup>R</sup> | This study |
| pXG10-vc1051                                                             | pMH056  | 5' UTR + 20 aa of<br>vc1051                     | Translational GFP<br>reporter                        | pSC101*,<br>Cm <sup>R</sup> | This study |
| pXG10-vc2030<br>(rne)                                                    | pJR045  | 5' UTR + 20 aa of<br>vc2030                     | Translational GFP<br>reporter                        | pSC101*,<br>Cm <sup>R</sup> | This study |
| pXG30-vc0147-<br>vc0148                                                  | pKT004  | 3' part of vc0147 +<br>IGR + 20 aa of<br>vc0148 | Translational GFP<br>reporter                        | pSC101*,<br>Cm <sup>R</sup> | This study |
| pXG10-vc2013<br>(ptsG)                                                   | pMD161  | 5' UTR + 20 aa of<br>vc2013                     | Translational GFP<br>reporter                        | pSC101*,<br>Cm <sup>R</sup> | This study |
| pXG10-vca0166                                                            | pJR036  | 5' UTR + 20 aa of<br>vca0166                    | Translational GFP<br>reporter                        | pSC101*,<br>Cm <sup>R</sup> | This study |
| pXG10-vc0966                                                             | pMH062  | 5' UTR + 20 aa of<br>vc0966                     | Translational GFP<br>reporter                        | pSC101*,<br>Cm <sup>R</sup> | This study |
| <b>Plasmids for RIL-seq target validation (sRNA expression plasmids)</b> |         |                                                 |                                                      |                             |            |
| pCMW-1                                                                   | pCMW-1  |                                                 | Control plasmid                                      | p15A,<br>Kan <sup>R</sup>   | (10)       |
| pEVS143                                                                  | pEVS143 | Ptac promotor                                   | Constitutive<br>overexpression<br>plasmid (template) | p15A,<br>Kan <sup>R</sup>   | (7)        |
| p-qrr1                                                                   | pAL030  | qrr1                                            | qrr1 expression<br>plasmid                           | p15A,<br>Kan <sup>R</sup>   | This study |
| p-qrr2                                                                   | pAL032  | qrr2                                            | qrr2 expression<br>plasmid                           | p15A,<br>Kan <sup>R</sup>   | This study |
| p-qrr3                                                                   | pAL031  | qrr3                                            | qrr3 expression<br>plasmid                           | p15A,<br>Kan <sup>R</sup>   | This study |
| p-qrr4                                                                   | pRH003  | qrr4                                            | qrr4 expression<br>plasmid                           | p15A,<br>Kan <sup>R</sup>   | (23)       |
| p-spot 42                                                                | pAS001  | spot 42                                         | spot 42 expression<br>plasmid                        | p15A,<br>Kan <sup>R</sup>   | (23)       |
| p-gcvB                                                                   | pRH006  | gcvB                                            | gcvB expression<br>plasmid                           | p15A,<br>Kan <sup>R</sup>   | (23)       |
| p-tfoR                                                                   | pMD104  | tfoR                                            | tfoR expression<br>plasmid                           | p15A,<br>Kan <sup>R</sup>   | (23)       |

|                                              |        |                                     |                                                    |                        |            |
|----------------------------------------------|--------|-------------------------------------|----------------------------------------------------|------------------------|------------|
| p- <i>vcr001</i>                             | pMH057 | <i>vcr001</i>                       | <i>vcr001</i> expression plasmid                   | p15A, Kan <sup>R</sup> | This study |
| p- <i>vcr017</i>                             | pSG001 | <i>vcr017</i>                       | <i>vcr017</i> expression plasmid                   | p15A, Kan <sup>R</sup> | (22)       |
| p- <i>vcr043</i>                             | pNP004 | <i>vcr043</i>                       | <i>vcr043</i> expression plasmid                   | p15A, Kan <sup>R</sup> | (23)       |
| p- <i>vcr227</i>                             | pJR035 | <i>vcr227</i>                       | <i>vcr227</i> expression plasmid                   | p15A, Kan <sup>R</sup> | This study |
| <b>Other plasmids</b>                        |        |                                     |                                                    |                        |            |
| pBAD1K-ctr                                   | pMD004 |                                     | Control plasmid                                    | p15A, Kan <sup>R</sup> | (13)       |
| pBAD1K- <i>qrrX</i>                          | pMD099 | <i>qrrX</i>                         | Inducible <i>qrrX</i> expression plasmid           | p15A, Kan <sup>R</sup> | This study |
| pBAD1K- <i>qrrX</i> * (M1)                   | pMD103 | <i>qrrX</i> * (G72C)                | Inducible <i>qrrX</i> * (M1) expression plasmid    | p15A, Kan <sup>R</sup> | This study |
| pBAD1K- <i>qrr4</i>                          | pMD176 | <i>qrr4</i>                         | Inducible <i>qrr4</i> expression plasmid           | p15A, Kan <sup>R</sup> | This study |
| pBAD1K- <i>qrr4</i> * (M1)                   | pMH086 | <i>qrr4</i> * (C28G)                | Inducible <i>qrr4</i> * (M1) expression plasmid    | p15A, Kan <sup>R</sup> | This study |
| pBAD1K- <i>qrr1</i>                          | pMH088 | <i>qrr1</i>                         | Inducible <i>qrr1</i> expression plasmid           | p15A, Kan <sup>R</sup> | This study |
| pBAD1K- <i>qrr1</i> * (M1)                   | pAL026 | <i>qrr1</i> * (C21G)                | Inducible <i>qrr1</i> * (M1) expression plasmid    | p15A, Kan <sup>R</sup> | This study |
| pBAD1K- <i>qrr2</i>                          | pMH092 | <i>qrr2</i>                         | Inducible <i>qrr2</i> expression plasmid           | p15A, Kan <sup>R</sup> | This study |
| pBAD1K- <i>qrr3</i>                          | pMH090 | <i>qrr3</i>                         | Inducible <i>qrr3</i> expression plasmid           | p15A, Kan <sup>R</sup> | This study |
| pBAD1K- <i>qrr4</i> * (M2)                   | pAL027 | <i>qrr4</i> * (C49T)                | Inducible <i>qrr4</i> * (M2) expression plasmid    | p15A, Kan <sup>R</sup> | This study |
| pCMW-1C- <i>mKate2</i>                       | pYH010 | <i>mKate2</i>                       | Promoterless plasmid for transcriptional reporters | p15A, Cm <sup>R</sup>  | (8)        |
| pCMW-1C- <i>P<sub>qrrX</sub>::mKate2</i>     | pAF012 | <i>P<sub>qrrX</sub>::mKate2</i>     | Transcriptional reporter for <i>QrrX</i>           | p15A, Cm <sup>R</sup>  | This study |
| pCMW-1C- <i>P<sub>qrrX</sub>::mKate2 ΔP1</i> | pMH083 | <i>P<sub>qrrX</sub>::mKate2 ΔP1</i> | Transcriptional reporter for <i>QrrX</i> ΔP1       | p15A, Cm <sup>R</sup>  | This study |
| pCMW-1C- <i>P<sub>qrrX</sub>::mKate2 ΔP1</i> | pMH085 | <i>P<sub>qrrX</sub>::mKate2 ΔP1</i> | Transcriptional reporter for <i>QrrX</i> ΔP1       | p15A, Cm <sup>R</sup>  | This study |
| pKAS32                                       | pKAS32 |                                     | Suicide plasmid for allelic exchange               | R6K, Amp <sup>R</sup>  | (9)        |
| pKAS32-Δ <i>rng</i>                          | pJR024 | up/downstream flanks of <i>rng</i>  | Suicide plasmid for <i>rng</i> knock-out           | R6K, Amp <sup>R</sup>  | This study |
| pKAS32-Δ <i>qrrX</i>                         | pAS005 | up/downstream flanks of <i>qrrX</i> | Suicide plasmid for <i>qrrX</i> knock-out          | R6K, Amp <sup>R</sup>  | This study |

|                                   |          |                                                    |                                                         |                          |            |
|-----------------------------------|----------|----------------------------------------------------|---------------------------------------------------------|--------------------------|------------|
| pKAS32- $\Delta qrrT$             | pAF013   | up/downstream flanks of <i>qrrT</i>                | Suicide plasmid for <i>qrrT</i> knock-out               | R6K, Amp <sup>R</sup>    | This study |
| pKAS32- <i>qrrT::3XFLAG</i>       | pMH075   | <i>qrrT::3XFLAG</i>                                | Suicide plasmid <i>qrrT::3XFLAG</i> allelic replacement | R6K, Amp <sup>R</sup>    | This study |
| pKAS32- $\Delta qrrT \Delta qrrX$ | pAL033   | up/downstream flanks of <i>qrrT-qrrX</i>           | Suicide plasmid for <i>qrrT-qrrX</i> knock-out          | R6K, Amp <sup>R</sup>    | This study |
| pKAS32- <i>hapR::3XFLAG</i>       | pASp017  | <i>hapR::3XFLAG</i>                                | Suicide plasmid <i>hapR::3XFLAG</i> allelic replacement | R6K, Amp <sup>R</sup>    | This study |
| pKAS32- <i>qrrX*</i> M1           | pMH091   | up/downstream flanks of <i>qrrX*</i> M1            | Suicide plasmid <i>qrrX*</i> (G72C) allelic replacement | R6K, Amp <sup>R</sup>    | This study |
| pKAS32- <i>qrr1*</i> M1           | pAL035   | up/downstream flanks of <i>qrr1*</i> M1            | Suicide plasmid <i>qrr1*</i> (C21G) allelic replacement | R6K, Amp <sup>R</sup>    | This study |
| pKAS32- <i>qrr4*</i> M1           | pAL036   | up/downstream flanks of <i>qrr4*</i> M1            | Suicide plasmid <i>qrr4*</i> (C28G) allelic replacement | R6K, Amp <sup>R</sup>    | This study |
| pBB1                              | ---      | <i>luxCDABE</i> ( <i>V. harveyi</i> )              | Bioluminescence assay                                   | Tet <sup>R</sup>         | (26)       |
| pEVS-protein                      | pMD080   | <i>Ptac</i> promotor, 5'UTR, MCS and T1 terminator | Protein expression plasmid                              | p15A, Kan <sup>R</sup>   | (23)       |
| p- <i>qrrT</i>                    | pAL001   | <i>qrrT</i>                                        | <i>qrrT</i> expression plasmid                          | p15A, Kan <sup>R</sup>   | This study |
| pCMW-2                            | pLH001   |                                                    | Control plasmid                                         | p15A, Kan <sup>R</sup>   | (13)       |
| p- <i>PqrrX</i>                   | pLH002   | <i>qrrX</i>                                        | <i>qrrX</i> expression plasmid with native promotor     | p15A, Kan <sup>R</sup>   | This study |
| pBBR1-MCS5- <i>lacZ</i>           | pBBR1MCS | <i>lacZ</i>                                        | Promotorless plasmid for transcriptional reporters      | pBBR1, Gent <sup>R</sup> | (11)       |
| pBBR1- <i>PqrrX-lacZ</i>          | pMD285   | <i>PqrrX::lacZ</i>                                 | Transcriptional reporter for QrrX                       | pBBR1, Gent <sup>R</sup> | This study |
| pZach                             | pZND132  | <i>V.ch.</i> genomic fragments                     | Genomic fragment expression plasmid                     | p15A, Cm <sup>R</sup>    | (12)       |
| pZach- <i>qrrT</i>                | ---      | <i>qrrT</i>                                        | <i>qrrT</i> fragment expression plasmid                 | p15A, Cm <sup>R</sup>    | (12)       |
| p- <i>qrrX</i>                    | pNP012   | <i>qrrX</i>                                        | <i>qrrX</i> expression plasmid                          | p15A, Kan <sup>R</sup>   | (23)       |
| p- <i>qrrX*</i> (M1)              | pAF015   | <i>qrrX*</i> (G72C)                                | <i>qrrX</i> (G72C) expression plasmid                   | p15A, Kan <sup>R</sup>   | This study |

**Table S3:** Strains used in this study

| Strain                    | Relevant markers / Genotype                                                                                                                                                                                            | Reference / Source  |
|---------------------------|------------------------------------------------------------------------------------------------------------------------------------------------------------------------------------------------------------------------|---------------------|
| <b><i>V. cholerae</i></b> |                                                                                                                                                                                                                        |                     |
| KPS-0014                  | C6706 wild-type                                                                                                                                                                                                        | (27)                |
| KPS-0023                  | C6706 <i>luxO</i> D47E                                                                                                                                                                                                 | (28)                |
| KPS-0358                  | C6706 $\Delta qrr1-4$                                                                                                                                                                                                  | (28)                |
| KPS-0995                  | C6706 <i>hfg::3XFLAG</i>                                                                                                                                                                                               | (6)                 |
| KPVC-10141                | C6706 <i>rne</i> <sup>TS</sup>                                                                                                                                                                                         | (13)                |
| KPVC-11271                | C6706 $\Delta qrr1-4$ <i>aphA::3XFLAG</i>                                                                                                                                                                              | This study          |
| KPVC-11952                | C6706 $\Delta rng$                                                                                                                                                                                                     | This study          |
| KPVC-11971                | C6706 <i>rne</i> <sup>TS</sup> $\Delta rng$                                                                                                                                                                            | This study          |
| KPVC-12032                | C6706 $\Delta qrrT$                                                                                                                                                                                                    | This study          |
| KPVC-12548                | C6706 <i>qrrT::3XFLAG</i>                                                                                                                                                                                              | This study          |
| KPVC-12735                | C6706 $\Delta qrrX$                                                                                                                                                                                                    | This study          |
| KPVC-12778                | C6706 $\Delta qrrX$ <i>aphA::3XFLAG</i>                                                                                                                                                                                | This study          |
| KPVC-12901                | C6706 <i>aphA::3XFLAG</i>                                                                                                                                                                                              | This study          |
| KPVC-12904                | C6706 $\Delta qrrT$ <i>hapR::3XFLAG</i>                                                                                                                                                                                | This study          |
| KPVC-12925                | C6706 <i>hapR::3XFLAG</i>                                                                                                                                                                                              | This study          |
| KPVC-13690                | C6706 $\Delta qrr1-4$ <i>hapR::3XFLAG</i>                                                                                                                                                                              | This study          |
| KPVC-13859                | C6706 $\Delta qrrX$ <i>hapR::3XFLAG</i>                                                                                                                                                                                | This study          |
| KPVC-14437                | C6706 $\Delta qrrT$ $\Delta qrrX$ <i>aphA::3XFLAG</i>                                                                                                                                                                  | This study          |
| KPVC-14438                | C6706 $\Delta qrrT$ $\Delta qrrX$ <i>hapR::3XFLAG</i>                                                                                                                                                                  | This study          |
| KPVC-14462                | C6706 <i>qrrX*</i> (M1)                                                                                                                                                                                                | This study          |
| KPVC-14473                | C6706 <i>qrr1*</i> (M1)                                                                                                                                                                                                | This study          |
| KPVC-14472                | C6706 <i>qrr4*</i> (M1)                                                                                                                                                                                                | This study          |
| CNV141                    | C6706 Ptac-sfGFP at <i>lacZ</i> site                                                                                                                                                                                   | Laboratory stock    |
| CNV175                    | C6706 Ptac-Mruby3 at <i>lacZ</i> site                                                                                                                                                                                  | Laboratory stock    |
| CNV259                    | C6706 $\Delta qrrX$ Ptac-sfGFP at <i>lacZ</i> site                                                                                                                                                                     | This study          |
| <b><i>E. coli</i></b>     |                                                                                                                                                                                                                        |                     |
| Top10                     | <i>F- mcrA</i> $\Delta(mrr-hsdRMS-mcrBC)$ $\phi 80lacZ\Delta M15$ $\Delta lacX74$ <i>nupG</i> <i>recA1</i> <i>araD139</i> $\Delta(ara-leu)7697$ <i>galE15</i> <i>galK16</i> <i>rpsL(StrR)</i> <i>endA1</i> $\lambda$ - | Invitrogen          |
| S17 $\lambda$ pir         | $\Delta lacU169$ ( $\Phi lacZ\Delta M15$ ), <i>recA1</i> , <i>endA1</i> , <i>hsdR17</i> , <i>thi-1</i> , <i>gyrA96</i> , <i>relA1</i> , <i>lambda</i> pir                                                              | New England Biolabs |

**Table S4:** Oligonucleotides used in this study

| Name                                                  | Sequence 5' to 3'      | Description                    |
|-------------------------------------------------------|------------------------|--------------------------------|
| <b>Oligonucleotides for linearization of plasmids</b> |                        |                                |
| KPO-0092                                              | CCACACATTATACGAGCCGA   | Plasmid construction (pEVS143) |
| KPO-0196                                              | GGAGAAACAGTAGAGAGTTGCG | Plasmid construction (pBAD1K)  |
| KPO-0267                                              | TAATAGGCCTAGGATGCATATG | Plasmid construction (pKAS32)  |
| KPO-0268                                              | CGTTAACAACCGGTACCTCTA  | Plasmid construction (pKAS32)  |

|                                                                              |                                                  |                                                                    |
|------------------------------------------------------------------------------|--------------------------------------------------|--------------------------------------------------------------------|
| KPO-1397                                                                     | GATCCGGTGATTGATTGAGC                             | Plasmid construction (pEVS143 and pBAD1K)                          |
| KPO-1702                                                                     | ATGCATGTGCTCAGTATCTCTATC                         | Plasmid construction (pXG10)                                       |
| KPO-1703                                                                     | GCTAGCGGATCCGCTGG                                | Plasmid construction (pXG10 and pXG30)                             |
| KPO-2591                                                                     | GTCGACAGGCCTAGTTG                                | Plasmid construction (pCMW-1C- <i>mKate2</i> )                     |
| KPO-2592                                                                     | GCATGCAAAAAGACCCTTC                              | Plasmid construction (pCMW-1C- <i>mKate2</i> and p- <i>PqrrX</i> ) |
| KPO-2757                                                                     | TGAGGATCCGGTGATTGATTGAGCA                        | Plasmid construction (p- <i>PqrrX</i> )                            |
| KPO-4646                                                                     | CCATTCGCCATTCAGGCTG                              | Plasmid construction (pXG30)                                       |
| pBAD-ATGrev                                                                  | GGTTAATTCCTCCTGTTAGC                             | Plasmid construction (pEVS-prot.)                                  |
| pZE-Stop-Xbal                                                                | TAATCTAGAGGCATCAAATAAACGA                        | Plasmid construction (pEVS-prot.)                                  |
| <b>Oligonucleotides for GFP reporter fusions (RIL-seq target validation)</b> |                                                  |                                                                    |
| KPO-1708                                                                     | GAGATACTGAGCACATGCATAATTGATTTGGGACTGTTCCCAA      | Plasmid construction (pNP058)                                      |
| KPO-1709                                                                     | GAGCCAGCGGATCCGCTAGCCAATTCGATAAGACGCGTCAC        | Plasmid construction (pNP058)                                      |
| KPO-2573                                                                     | GAGATACTGAGCACATGCATAATCCCTGTCAGGTGTAAG          | Plasmid construction (pMD092)                                      |
| KPO-2574                                                                     | GAGCCAGCGGATCCGCTAGCACCAGCACCTAACAGCAG           | Plasmid construction (pMD092)                                      |
| KPO-2779                                                                     | GAGATACTGAGCACATGCAT<br>CGGAAAATATAATGCAAAAAGTGG | Plasmid construction (pMD161)                                      |
| KPO-2780                                                                     | GAGCCAGCGGATCCGCTAGC<br>GATTAAGTTATTAGAATTGCTGGG | Plasmid construction (pMD161)                                      |
| KPO-3003                                                                     | GTTTTTATGCATGATACTAATAATAACGCATAACAATATC         | Plasmid construction (pYH033)                                      |
| KPO-3004                                                                     | GTTTTTGCTAGCATGATGACGCTGTGCGCTTA                 | Plasmid construction (pYH033)                                      |
| KPO-3005                                                                     | GTTTTTATGCATGTACATGTGTAACCGATGGG                 | Plasmid construction (pYH034)                                      |
| KPO-3006                                                                     | GTTTTTGCTAGCAGCAATCCCCACTAGCAATC                 | Plasmid construction (pYH034)                                      |
| KPO-3054                                                                     | GTTTTTATGCATGCTCGTCACAGAACGAAATAC                | Plasmid construction (pYH038)                                      |
| KPO-3055                                                                     | GTTTTTGCTAGCAAAACAGAGGGCAAGCAAACAAG              | Plasmid construction (pYH038)                                      |
| KPO-3795                                                                     | GAGATACTGAGCACATGCATGTTTTGTTGGCATGGTCGC          | Plasmid construction (pJR026)                                      |
| KPO-3796                                                                     | CCAGCGGATCCGCTAGCAATACGTTGCCGTTTTAGC             | Plasmid construction (pJR026)                                      |
| KPO-3813                                                                     | GAGATACTGAGCACATGCATCTAAAAACCATCAGTCCCC          | Plasmid construction (pJR029)                                      |
| KPO-3814                                                                     | CCAGCGGATCCGCTAGCACTATCCTTTTCAGGCATTCG           | Plasmid construction (pJR029)                                      |
| KPO-4019                                                                     | GAGATACTGAGCACATGCATGGCTCTTAGGTAAGAGTTGTT        | Plasmid construction (pJR036)                                      |



|          |                                                    |                               |
|----------|----------------------------------------------------|-------------------------------|
| KPO-4020 | CCAGCGGATCCGCTAGCGAAACCAAACCTTTAGTTTCG             | Plasmid construction (pJR036) |
| KPO-4056 | GAGATACTGAGCACATGCAT TTCTTCTGCGTTAAGCGCAA          | Plasmid construction (pMH071) |
| KPO-4057 | CCAGCGGATCCGCTAGCAGCCATTCCGGTGACCATC               | Plasmid construction (pMH071) |
| KPO-4060 | GAGATACTGAGCACATGCATACAAAATTAATGAGGCTACCTT         | Plasmid construction (pMH056) |
| KPO-4061 | CCAGCGGATCCGCTAGCTGCAACCACGCCTAGAAAG               | Plasmid construction (pMH056) |
| KPO-4078 | GAGATACTGAGCACATGCATCAAACAAAATGAAGGAGAAAGA         | Plasmid construction (pMH059) |
| KPO-4079 | CCAGCGGATCCGCTAGCATGCTCTTTGGCACGAACAC              | Plasmid construction (pMH059) |
| KPO-4132 | GAGATACTGAGCACATGCATATAATACGCATAATAAAACCCG         | Plasmid construction (pJR040) |
| KPO-4133 | CCAGCGGATCCGCTAGCCCAGAGGGTGTTCTTTTGC               | Plasmid construction (pJR040) |
| KPO-4136 | CCAGCGGATCCGCTAGCCATAGGGCTTCTCACTTTAAA             | Plasmid construction (pMH066) |
| KPO-4137 | GAGATACTGAGCACATGCATTTCGATGGTCACCTGAGTTG           | Plasmid construction (pJR039) |
| KPO-4138 | CCAGCGGATCCGCTAGCTGGGCAGTTTACCCGGG                 | Plasmid construction (pJR039) |
| KPO-4184 | GAGATACTGAGCACATGCATGAATTTTAGGTAAGCCATTGG          | Plasmid construction (pJR042) |
| KPO-4185 | CCAGCGGATCCGCTAGCGAGTGCGCAGCCACTTAATG              | Plasmid construction (pJR042) |
| KPO-4210 | GAGATACTGAGCACATGCATAAAAAATTTCTCCCTAGCACAC         | Plasmid construction (pMH063) |
| KPO-4211 | CCAGCGGATCCGCTAGCCGCTGGTAGGAATCGGGTA               | Plasmid construction (pMH063) |
| KPO-4212 | GAGATACTGAGCACATGCAT<br>GTTTTATTTTATAGCTTCAAATAAAG | Plasmid construction (pMH062) |
| KPO-4213 | CCAGCGGATCCGCTAGCTGCAGCAGGACGAGTGTG                | Plasmid construction (pMH062) |
| KPO-4276 | GAGATACTGAGCACATGCAT<br>GAAAATGCCACTTTTTCATAAAGTC  | Plasmid construction (pMH060) |
| KPO-4277 | CCAGCGGATCCGCTAGCTTGGCGGACCACGGTATAG               | Plasmid construction (pMH060) |
| KPO-4469 | GAGATACTGAGCACATGCATATTCCCTATGCTGAGCGC             | Plasmid construction (pJR043) |
| KPO-4470 | CCAGCGGATCCGCTAGCATAAATTTGATAAATTGCAGCGG           | Plasmid construction (pJR043) |
| KPO-4471 | GAGATACTGAGCACATGCATAGGACTTACACCGTATCAAC           | Plasmid construction (pJR044) |
| KPO-4472 | CCAGCGGATCCGCTAGCTCGGTCTGCATTCATAAAATTG            | Plasmid construction (pJR044) |
| KPO-4473 | GAGATACTGAGCACATGCATCTGCAAGAGCTGAACCGG             | Plasmid construction (pJR045) |
| KPO-4474 | CCAGCGGATCCGCTAGCATCGACCAACGCGACACG                | Plasmid construction (pJR045) |
| KPO-4642 | GAGATACTGAGCACATGCATAAAAAACCTACTTATCTACGTC         | Plasmid construction (pMH067) |
| KPO-4643 | CCAGCGGATCCGCTAGCGGCAAAGGTGAGCAGAGG                | Plasmid construction (pMH067) |

|                                                                                  |                                                        |                               |
|----------------------------------------------------------------------------------|--------------------------------------------------------|-------------------------------|
| KPO-4651                                                                         | CAGCCTGAATGGCGAATGGCACTGGCAGTTGCACGC                   | Plasmid construction (pMH066) |
| KPO-4935                                                                         | CAGCCTGAATGGCGAATGGCCACTCAGCGCTTTCCGT                  | Plasmid construction (pMH072) |
| KPO-4936                                                                         | CCAGCGGATCCGCTAGCGGTGCTTCCCGCGCTTTG                    | Plasmid construction (pMH072) |
| KPO-4937                                                                         | GAGATACTGAGCACATGCATGTCCGTATAGTGACACAGA                | Plasmid construction (pMH073) |
| KPO-4938                                                                         | CCAGCGGATCCGCTAGCAATGGTCTGCAAATCTAAATTAAC              | Plasmid construction (pMH073) |
| KPO-5187                                                                         | CAGCCTGAATGGCGAATGGCGTTGGTTGATTGATAGCCG                | Plasmid construction (pKT003) |
| KPO-5188                                                                         | CCAGCGGATCCGCTAGCTGCATTGGCGCCAGCCAA                    | Plasmid construction (pKT003) |
| KPO-5191                                                                         | GAGATACTGAGCACATGCATGCATTACCATCAGTAAGCGC               | Plasmid construction (pKT001) |
| KPO-5192                                                                         | CCAGCGGATCCGCTAGCTTGAATCAGTTGATAAACTTTTTTC             | Plasmid construction (pKT001) |
| KPO-5208                                                                         | CAGCCTGAATGGCGAATGGCCATCACGGGCATTACC                   | Plasmid construction (pKT004) |
| KPO-5209                                                                         | CCAGCGGATCCGCTAGCATACGCTTTACTGACTTGCTG                 | Plasmid construction (pKT004) |
| KPO-5367                                                                         | CCAGCAGCGGAGCCAGCGGATCCGCTAGC<br>CAATATATTGCGATCTATAC  | Plasmid construction (pKT005) |
| KPO-5369                                                                         | CCAGCAGCGGAGCCAGCGGATCCGCTAGC<br>GGCACACCCTGACAGCAGAAC | Plasmid construction (pKT008) |
| KPO-5372                                                                         | GAGATACTGAGCACATGCATCTGGCTCACCGTTCAGCCGC               | Plasmid construction (pSM001) |
| KPO-5373                                                                         | CCAGCAGCGGAGCCAGCGGATCCGCTAGC<br>GATCTTGGAGATCAGTCCCG  | Plasmid construction (pSM001) |
| KPO-5371                                                                         | CCAGCAGCGGAGCCAGC<br>GGATCCGCTAGCAAACGAGTTGTTGGTAACC   | Plasmid construction (pKT007) |
| KPO-5408                                                                         | GAGATACTGAGCACATGCAT AAGGAAGTAATAAGGTGGAATA            | Plasmid construction (pKT005) |
| KPO-5409                                                                         | GAGATACTGAGCACATGCAT GTTATTCGCTCCCTTTTTTATG            | Plasmid construction (pKT008) |
| KPO-5410                                                                         | GAGATACTGAGCACATGCATGCTATCTAGCAGAAGAGGAG               | Plasmid construction (pKT007) |
| KPO-5411                                                                         | GAGATACTGAGCACATGCATCAAATTCGATAGAACAACCT               | Plasmid construction (pKT006) |
| KPO-5412                                                                         | CCAGCGGATCCGCTAGCTGGAATCATGCCACACGAT                   | Plasmid construction (pKT006) |
| KPO-7574                                                                         | GAGATACTGAGCACATGCATCTCAGGATTAATGACTGAAG               | Plasmid construction (pMH093) |
| KPO-7575                                                                         | CCAGCGGATCCGCTAGCTAAAATTTGTAAGACCAGATTTTC              | Plasmid construction (pMH093) |
| <b>Oligonucleotides for sRNA expression plasmids (RIL-seq target validation)</b> |                                                        |                               |
| KPO-3965                                                                         | GGCTCGTATAATGTGTGGGTACCCCTGATAATTCGTATC                | Plasmid construction (pJR035) |
| KPO-3966                                                                         | GCTCAATCAATCACCGGATCCTACACAGGGATTAATCTC                | Plasmid construction (pJR035) |
| KPO-4062                                                                         | GGCTCGTATAATGTGTGGATTTTTCTTGGGCTTCCCC                  | Plasmid construction (pMH057) |
| KPO-4063                                                                         | GCTCAATCAATCACCGGATCGGCGGGTTTCTCATTGTG                 | Plasmid construction (pMH057) |

|                                                            |                                                                        |                                       |
|------------------------------------------------------------|------------------------------------------------------------------------|---------------------------------------|
| KPO-7115                                                   | GCTCAATCAATCACCGGATC GAGCAAGTGTTTAGGAAGAG                              | Plasmid construction (pMH088, pAL030) |
| KPO-7117                                                   | GCTCAATCAATCACCGGATC GTGAAAATAGCGGGCGATC                               | Plasmid construction (pMH092, pAL032) |
| KPO-7119                                                   | GCTCAATCAATCACCGGATC GAATGTTGCAGGCTAAATGG                              | Plasmid construction (pMH090, pAL031) |
| KPO-7587                                                   | TCGGCTCGTATAATGTGTGGGACCCGCAAGGGTCACC                                  | Plasmid construction (pAL030)         |
| KPO-7588                                                   | TCGGCTCGTATAATGTGTGGGACCCTTAATTAAGCCGAGG                               | Plasmid construction (pAL031)         |
| KPO-7603                                                   | TCGGCTCGTATAATGTGTGGGACCCTTGTTAAGCCGAGG                                | Plasmid construction (pAL032)         |
| <b>Oligonucleotides for construction of other plasmids</b> |                                                                        |                                       |
| KPO-1026                                                   | P-TGAATAATCAAAGACGAGGCTC                                               | Plasmid construction (pNP012)         |
| KPO-1027                                                   | gTTTTTCTAGAGAACAGCCAGTTAACTTGAGA                                       | Plasmid construction (pNP012)         |
| KPO-1301                                                   | CCAGTTAACTTGAGATGAAAATG<br>GTGCAAGGTTGAATTTTTGTTAGTG                   | Plasmid construction (pAS005)         |
| KPO-1302                                                   | CATTTTCATCTCAAGTTAACTGG                                                | Plasmid construction (pAS005)         |
| KPO-1304                                                   | GTTTTTGGTACCGAATGCGTTGTA ACTCTATGAAC                                   | Plasmid construction (pAS005)         |
| KPO-1305                                                   | GTTTTTCCTAGGTACGGCATAAGTCATGACTCG                                      | Plasmid construction (pAS005)         |
| KPO-1525                                                   | GCGGCCCTCTCACTTCC                                                      | Plasmid construction (pMH086)         |
| KPO-1529                                                   | GGAAGTGAGAGGGCCGCGGCAAAGCCGTTTTCCATAG                                  | Plasmid construction (pMH086)         |
| KPO-1734                                                   | TGAGGATCCGGTGATTGATT                                                   | Plasmid construction (pMH085)         |
| KPO-1737                                                   | AATCAATCACCGGATCCTCAAAAAAAAAAGCACCCCGGTTTG                             | Plasmid construction (pMH085)         |
| KPO-1872                                                   | CATATGCATCCTAGGCCTATTAGCGCTCTGGATGTATTAG                               | Plasmid construction (pASp017)        |
| KPO-1873                                                   | ATAAAGATCATGATATCGACTACAAAGATGACGATAAA<br>TAGTAATTTCTTGGGCAGCACAAAG    | Plasmid construction (pASp017)        |
| KPO-1874                                                   | GTGCATATCATGATCTTTATAATCACCGTCATGGTCTTTG<br>TAGTCGTTCTTATAGATACACAGCAT | Plasmid construction (pASp017)        |
| KPO-1875                                                   | TAGAGGTACCGGTTGTTAACGCAATCCAACCAAACTAAATC                              | Plasmid construction (pASp017)        |
| KPO-2558                                                   | CGCAACTCTCTACTGTTTCTCCTGAATAATCAAAGACGAGGC                             | Plasmid construction (pMD099)         |
| KPO-2559                                                   | GCTCAATCAATCACCGGATCGAACAGCCAGTTAACTTGAG                               | Plasmid construction (pMD099)         |
| KPO-3451                                                   | TAGAGGTACCGGTTGTTAACGCTTGGCTGCTGCTGGTCT                                | Plasmid construction (pJR024)         |
| KPO-3452                                                   | GAGCGCACCTCAATGATTA                                                    | Plasmid construction (pJR024)         |
| KPO-3453                                                   | TAATCATTGAGGTGCGCTCTAAATAGGGCATCGGGTGAT                                | Plasmid construction (pJR024)         |
| KPO-3454                                                   | TATGCATCCTAGGCCTATTACCAGAGGTAACAGGTTCTC                                | Plasmid construction (pJR024)         |
| KPO-3676                                                   | GAAGGGTCTTTTTGCATGCCTACTTGTACAGCGGCTTTAT                               | Plasmid construction (pAF012)         |

|          |                                                      |                                               |
|----------|------------------------------------------------------|-----------------------------------------------|
| KPO-3677 | CAACTAGGCCTGTCGACTATTCAATCATTAGTTTAGGTGCAA           | Plasmid construction (pAF012)                 |
| KPO-3741 | TAGAGGTACCGGTTGTTAACGGTCTCTGCACTCGCCAG               | Plasmid construction (pAF013, pAL033)         |
| KPO-3742 | ACCGATAAATGTGCCAAGATAAC                              | Plasmid construction (pAF013, pAL033)         |
| KPO-3743 | TCTTGGCACATTTATCGGT<br>GATGAAAATGGGTGAAAAGGAAAG      | Plasmid construction (pAF013)                 |
| KPO-3744 | CATATGCATCCTAGGCCTATTA<br>GAACATCTGACAAAAATCCTCTC    | Plasmid construction (pAF013)                 |
| KPO-3749 | CAACTCATGCCTAGGGTTATTAACAAAAATCAAAAAC                | Plasmid construction (pMD103, pMH092, pMH091) |
| KPO-3750 | TAACCCTAGGCATGAGTTGTCAGTCAATAAACAG                   | Plasmid construction (pMD103, pMH092, pMH091) |
| KPO-3779 | CGCAACTCTCTACTGTTTCTCCGACCCTTCTAAGCCGAGG             | Plasmid construction (pMD176)                 |
| KPO-3780 | GCTCAATCAATCACCGGATCCCACGAAAGCCAAGATGCTAT            | Plasmid construction (pMD176)                 |
| KPO-3870 | GCTAACAGGAGGAATTAACCATGGATTATATTCACCTCTCC            | Plasmid construction (pAL001)                 |
| KPO-4660 | GTCGACCTCGAGGGGG                                     | Plasmid construction (pMD285)                 |
| KPO-4661 | ACTAGTTCTAGAGCGGCCG                                  | Plasmid construction (pMD285)                 |
| KPO-4662 | GGCCGCTCTAGAACTAGT CTA CTACTTGTACAGCGGCTTTATTT       | Plasmid construction (pMD285)                 |
| KPO-4663 | CCCCTCGAGGTCGAC TATTCAATCATTAGTTTAGGTGCAAG           | Plasmid construction (pMD285)                 |
| KPO-5419 | GAAGGGTCTTTTTGCATGCCTACTTGTACAGCGGCTTTATT            | Plasmid construction (pLH002)                 |
| KPO-5420 | TGCTCAATCAATCACCGGATCCTCA<br>AAAAAGGAAAGGGTCAGCAAAC  | Plasmid construction (pLH002)                 |
| KPO-6321 | TCGTTTTATTTGATGCCTCTAGATTA<br>TCAAGTTAACTGGCTGTTTCAG | Plasmid construction (pAL001)                 |
| KPO-6752 | CAATTTACGATTGATATGCAAATCACATTGTTAAC                  | Plasmid construction (pMH085)                 |
| KPO-6753 | CGTAAATTGACCTTCTTTTCACTAACAAAAATTC                   | Plasmid construction (pMH083)                 |
| KPO-6754 | GTTAGTGAAAAGAAGGTCAATTTACGATTTGGAAA                  | Plasmid construction (pMH083)                 |
| KPO-6884 | GATTTGCATATCAATCGTAAATTGACCATTTACTTC                 | Plasmid construction (pMH085)                 |
| KPO-7032 | CGAGGGTCACCTAGGCAACTGACGTTGTTAGTGAAC                 | Plasmid construction (pMH086, pAL035)         |
| KPO-7033 | CTAACAAACGTCAGTTGCCTAGGTGACCCTCGGCTT                 | Plasmid construction (pMH086, pAL035)         |
| KPO-7114 | CGCAACTCTCTACTGTTTCTCC GACCCGCAAGGGTCACC             | Plasmid construction (pMH088)                 |
| KPO-7118 | CGCAACTCTCTACTGTTTCTCC GACCCTTAATTAAGCCGAGG          | Plasmid construction (pMH090)                 |
| KPO-7120 | TAGAGGTACCGGTTGTTAACG CAGCATTGCCGAATACAAG            | Plasmid construction (pMH091)                 |
| KPO-7121 | CATATGCATCCTAGGCCTATTA CACCTCTCCGATTTAGC             | Plasmid construction (pMH091)                 |

|                                                   |                                                  |                                       |
|---------------------------------------------------|--------------------------------------------------|---------------------------------------|
| KPO-7122                                          | TAGAGGTACCGGTTGTTAACG GATGGATTGGGATTCATTGC       | Plasmid construction (pAL035)         |
| KPO-7123                                          | CATATGCATCCTAGGCCTATTA<br>CGCATGATGTAACAGACGAAC  | Plasmid construction (pAL035)         |
| KPO-7338                                          | CGCAACTCTCTACTGTTTCTCC GACCCTTGTTAAGCCGAGG       | Plasmid construction (pMH092)         |
| KPO-7431                                          | AAGGGTCACCTAGgCAACTGACGTTGTTAGTGAAT              | Plasmid construction (pAL026, pAL036) |
| KPO-7432                                          | AACAACGTCAGTTGcCTAGGTGACCCCTTGCGG                | Plasmid construction (pAL026, pAL036) |
| KPO-7433                                          | ACGTTGTTAGTGAAaACCATTGTTACACTTATAG               | Plasmid construction (pAL027)         |
| KPO-7434                                          | GTGTGAACAATGGTaTTCATAACAACGTCAGTTG               | Plasmid construction (pAL027)         |
| KPO-7604                                          | TCTTGGCACATTTATCGGTGTGCAAGGTTGAATTTTTGTTAGTG     | Plasmid construction (pAL033)         |
| KPO-7605                                          | CATATGCATCCTAGGCCTATTA<br>GAATGCGTTGTAACCTATGAAC | Plasmid construction (pAL033)         |
| KPO-7668                                          | TAGAGGTACCGGTTGTTAACG GCGTCCTTCTTGCACTTCC        | Plasmid construction (pAL036)         |
| KPO-7669                                          | CATATGCATCCTAGGCCTATTA GGTGGATGATCTGCTTTCTG      | Plasmid construction (pAL036)         |
| <b>Oligonucleotides for Northern blot probing</b> |                                                  |                                       |
| KPO-0060                                          | GTCTATTGGCTGTTATTTGTGAAC                         | Qrr1 oligoprobe                       |
| KPO-0061                                          | GGCTTATATATGATGTGAACAATAC                        | Qrr2 oligoprobe                       |
| KPO-0062                                          | GGCTTATATATGATGTGAACAATAC                        | Qrr3 oligoprobe                       |
| KPO-0063                                          | CGTCTATAAGTGTGAACAATGGTG                         | Qrr4 oligoprobe                       |
| KPO-0243                                          | TTCGTTTCACTTCTGAGTTCGG                           | 5S oligoprobe                         |
| KPO-3794                                          | GACCCTTTCCTTTGTTGCTC                             | QrrX oligoprobe                       |
| <b>Oligonucleotides for qPCR</b>                  |                                                  |                                       |
| KPO-0496                                          | GTTTGTACTTTACCGAACGC                             | <i>PvqmR</i> qPCR                     |
| KPO-1539                                          | CGACACTGTTTCATTCATTGG                            | <i>PqrrX</i> qPCR                     |
| KPO-2378                                          | GGTAACCCAGAACTACCACTG                            | <i>recA</i> qPCR                      |
| KPO-2379                                          | CACCACTTCTTCGCCTTCTT                             | <i>recA</i> qPCR                      |
| KPO-7711                                          | AGTTTAGGTGCAAGGTTGA                              | <i>PqrrX</i> qPCR                     |
| KPO-7712                                          | CGCCAATTATGTCGGTTTC                              | <i>PvqmR</i> qPCR                     |

## Supplemental References

1. M. Rehmsmeier, P. Steffen, M. Hochsmann, R. Giegerich, Fast and effective prediction of microRNA/target duplexes. *RNA* **10**, 1507-1517 (2004).
2. F. Corpet, Multiple sequence alignment with hierarchical clustering. *Nucleic acids research* **16**, 10881-10890 (1988).
3. C. P. Corcoran *et al.*, Superfolder GFP reporters validate diverse new mRNA targets of the classic porin regulator, MicF RNA. *Molecular microbiology* **84**, 428-445 (2012).
4. K. Papenfort, K. U. Forstner, J. P. Cong, C. M. Sharma, B. L. Bassler, Differential RNA-seq of *Vibrio cholerae* identifies the VqmR small RNA as a regulator of biofilm formation. *Proc Natl Acad Sci U S A* **112**, E766-775 (2015).
5. D. G. Gibson, Synthesis of DNA fragments in yeast by one-step assembly of overlapping oligonucleotides. *Nucleic Acids Res* **37**, 6984-6990 (2009).
6. N. Peschek, M. Hoyos, R. Herzog, K. U. Forstner, K. Papenfort, A conserved RNA seed-pairing domain directs small RNA-mediated stress resistance in enterobacteria. *EMBO J* **38**, e101650 (2019).
7. A. K. Dunn, D. S. Millikan, D. M. Adin, J. L. Bose, E. V. Stabb, New rfp- and pES213-derived tools for analyzing symbiotic *Vibrio fischeri* reveal patterns of infection and lux expression in situ. *Appl Environ Microbiol* **72**, 802-810 (2006).
8. R. Herzog, N. Peschek, K. S. Frohlich, K. Schumacher, K. Papenfort, Three autoinducer molecules act in concert to control virulence gene expression in *Vibrio cholerae*. *Nucleic Acids Res* **47**, 3171-3183 (2019).
9. K. Skorupski, R. K. Taylor, Positive selection vectors for allelic exchange. *Gene* **169**, 47-52 (1996).
10. C. M. Waters, B. L. Bassler, The *Vibrio harveyi* quorum-sensing system uses shared regulatory components to discriminate between multiple autoinducers. *Genes Dev* **20**, 2754-2767 (2006).
11. L. Fried, J. Lassak, K. Jung, A comprehensive toolbox for the rapid construction of lacZ fusion reporters. *J Microbiol Methods* **91**, 537-543 (2012).
12. Z. Donnell (2015) Regulation of cqsA and cqsS in *Vibrio cholerae*. (Princeton University, Princeton).
13. M. Hoyos, M. Huber, K. U. Forstner, K. Papenfort, Gene autoregulation by 3' UTR-derived bacterial small RNAs. *Elife* **9** (2020).
14. M. Huber, K. S. Frohlich, J. Radmer, K. Papenfort, Switching fatty acid metabolism by an RNA-controlled feed forward loop. *Proc Natl Acad Sci U S A* **117**, 8044-8054 (2020).
15. B. M. Davis, M. K. Waldor, RNase E-dependent processing stabilizes MicX, a *Vibrio cholerae* sRNA. *Mol Microbiol* **65**, 373-385 (2007).
16. J. P. Bardill, X. Zhao, B. K. Hammer, The *Vibrio cholerae* quorum sensing response is mediated by Hfq-dependent sRNA/mRNA base pairing interactions. *Mol Microbiol* **80**, 1381-1394 (2011).
17. B. K. Hammer, B. L. Bassler, Regulatory small RNAs circumvent the conventional quorum sensing pathway in pandemic *Vibrio cholerae*. *Proc Natl Acad Sci U S A* **104**, 11145-11149 (2007).
18. Y. Shao, B. L. Bassler, Quorum-sensing non-coding small RNAs use unique pairing regions to differentially control mRNA targets. *Mol Microbiol* **83**, 599-611 (2012).
19. S. T. Rutherford, J. C. van Kessel, Y. Shao, B. L. Bassler, AphA and LuxR/HapR reciprocally control quorum sensing in vibrios. *Genes Dev* **25**, 397-408 (2011).
20. S. Yamamoto *et al.*, Identification of a chitin-induced small RNA that regulates translation of the tfoX gene, encoding a positive regulator of natural competence in *Vibrio cholerae*. *J Bacteriol* **193**, 1953-1965 (2011).
21. K. Han, S. Lory, Toward a Comprehensive Analysis of Posttranscriptional Regulatory Networks: a New Tool for the Identification of Small RNA Regulators of Specific mRNAs. *mBio* **12** (2021).
22. N. Peschek *et al.*, RNA-mediated control of cell shape modulates antibiotic resistance in *Vibrio cholerae*. *Nat Commun* **11**, 6067 (2020).
23. K. Venkat *et al.*, A dual-function RNA balances carbon uptake and central metabolism in *Vibrio cholerae*. *EMBO J* 10.15252/embj.2021108542, e108542 (2021).
24. T. Song *et al.*, A new *Vibrio cholerae* sRNA modulates colonization and affects release of outer membrane vesicles. *Mol Microbiol* **70**, 100-111 (2008).

25. T. Song, D. Sabharwal, S. N. Wai, VrrA mediates Hfq-dependent regulation of OmpT synthesis in *Vibrio cholerae*. *J Mol Biol* **400**, 682-688 (2010).
26. M. B. Miller, K. Skorupski, D. H. Lenz, R. K. Taylor, B. L. Bassler, Parallel quorum sensing systems converge to regulate virulence in *Vibrio cholerae*. *Cell* **110**, 303-314 (2002).
27. K. H. Thelin, R. K. Taylor, Toxin-coregulated pilus, but not mannose-sensitive hemagglutinin, is required for colonization by *Vibrio cholerae* O1 El Tor biotype and O139 strains. *Infect Immun* **64**, 2853-2856 (1996).
28. S. L. Svenningsen, K. C. Tu, B. L. Bassler, Gene dosage compensation calibrates four regulatory RNAs to control *Vibrio cholerae* quorum sensing. *EMBO J* **28**, 429-439 (2009).
