# Supplementary material for: An RNA sponge controls quorum sensing dynamics and biofilm formation in Vibrio cholerae
Source: PubMed Central journal article supplement (PMC9732341; doi:10.1038/s41467-022-35261-x), 2022-12-08
Supplement: 41467_2022_35261_MOESM3_ESM.pdf [file 41467_2022_35261_MOESM3_ESM.pdf]

## **Description of Additional Supplementary Files:**

**Supplementary Data 1:** List of candidate sRNA-target interactions in *V. cholerae* identified by RILSeq
